# Supplementary material for: Photochemical transformation of residential wood combustion emissions: dependence of organic aerosol composition on OH exposure
Source: Copernicus journal article supplement (doi:10.5194/acp-20-6357-2020), 2020-06-03
Supplement: Supplementary file 1 [file acp-20-6357-2020-supplement.zip]

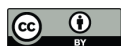

## *Supplement of*

# **Photochemical transformation of residential wood combustion emissions: dependence of organic aerosol composition on OH exposure**

**Anni Hartikainen et al.**

*Correspondence to:* Anni Hartikainen ([anni.hartikainen@uef.fi](mailto:anni.hartikainen@uef.fi))

- [acp-20-6357-2020-supplement-title-page.pdf](#)
- [Hartikainen\\_2020\\_TableS11.xlsx](#)
- [Hartikainen\\_etal\\_2020\\_Supplement.pdf](#)

The copyright of individual parts of the supplement might differ from the CC BY 4.0 License.
