# Supplementary material for: Photochemical transformation of residential wood combustion emissions: dependence of organic aerosol composition on OH exposure
Source: Copernicus journal article supplement (doi:10.5194/acp-20-6357-2020), 2020-06-03
Supplement: Supplementary file 2 [file acp-20-6357-2020-supplement.zip]

## Table of Contents

|                                                                                                                    |           |
|--------------------------------------------------------------------------------------------------------------------|-----------|
| <b>Section S1 – Compounds assessed by online analyses.....</b>                                                     | <b>2</b>  |
| Table S1: Gaseous compounds measured by FTIR .....                                                                 | 2         |
| Table S2: Organic gaseous compounds identified by PTR-ToF-MS .....                                                 | 3         |
| Table S3: Polycyclic aromatic compounds included in the SP-HR-ToF-AMS HR-PAH analysis.....                         | 4         |
| <b>Section S2 – OH exposure and external OH reactivity of RWC exhaust.....</b>                                     | <b>5</b>  |
| Figure S1: OH exposure during photochemical aging experiments .....                                                | 5         |
| Figure S2: Contributions of the gaseous compounds measured by FTIR to the external OH reactivity of RWC exhaust .. | 6         |
| <b>Section S3 – Primary emission .....</b>                                                                         | <b>7</b>  |
| Figure S3: Size distributions of diluted primary aerosol and condensation sinks in the PEAR OFR .....              | 7         |
| Figure S4: Modified combustion efficiency .....                                                                    | 7         |
| Figure S5: Average shares of the aromatic compound groups in unaged aerosol.....                                   | 8         |
| Figure S6: Correlation between SP-HR-ToF-AMS and thermal-optical analyses.....                                     | 8         |
| Table S4: Concentrations of primary gaseous emissions measured by FTIR. ....                                       | 9         |
| <b>Section S4 – Conditions in the PEAR OFR .....</b>                                                               | <b>10</b> |
| S4.1. Photochemical aging conditions .....                                                                         | 10        |
| Table S5: Estimation equations used for determination of exposures .....                                           | 11        |
| Table S6: Average radical exposures in the PEAR OFR.....                                                           | 11        |
| Figure S7: $\text{OHR}_{\text{ext}}$ in the PEAR OFR and riskiness of the aging conditions .....                   | 12        |
| Figure S8: Estimated fate of $\text{RO}_2$ in the PEAR OFR.....                                                    | 12        |
| Figure S9: Relative shares and atmospheric relevance of reaction pathways.....                                     | 13        |
| Table S7: Absorption cross sections and reaction rates of some of the major VOCs from RWC .....                    | 13        |
| Figure S10: Relative shares of degradation pathways for benzene and toluene .....                                  | 14        |
| S4.2 Fate of low-volatility organic compounds in the PEAR OFR .....                                                | 15        |
| Figure S11: Relative shares of the LVOC fates .....                                                                | 16        |
| <b>Section S5 – Transformation of the particulate phase.....</b>                                                   | <b>17</b> |
| Figure S12: Particle number enhancement ratios .....                                                               | 17        |
| Table S8: Chemical composition of the PM .....                                                                     | 18        |
| Figure S13: Relationship between photochemical age and OA composition .....                                        | 19        |
| Figure S14: Compounds analysed by IDTD-GC-ToFMS displayed in the $\text{OS}_{\text{C-NC}}$ space .....             | 20        |
| Figure S15: Timeseries of the concentrations and average carbon oxidation states of particulate OA. ....           | 20        |
| Figure S16: Spectra of the PMF factors.....                                                                        | 21        |
| Figure S17: Correlations between PMF factors and tracers .....                                                     | 21        |
| S5.1 In-situ derivatisation and thermal desorption - gas-chromatography - time-of-flight mass spectrometry .....   | 22        |
| Table S9: Isotopically labelled internal standards used for polar compounds .....                                  | 22        |
| Table S10: Isotopically labelled internal standards for nonpolar compounds .....                                   | 23        |
| Table S11: Secondary concentrations of compounds measured by IDTD-GC-ToFMS. Attached as a .xlsx file.....          | 23        |
| Table S12: Pearson correlation coefficients between the particulate OA constituents .....                          | 24        |
| <b>References .....</b>                                                                                            | <b>25</b> |

## Section S1 – Organic species assessed by online analyses

**Table S1: Gaseous compounds measured by FTIR and their reaction rates with OH ( $k_{OH}$ ; NIST Kinetics Database, Manion et al., 2015).**

| Compound               | Formula                                      | OGC group   | CAS        | Range | unit  | $k_{OH}$<br>[cm <sup>3</sup> molec. <sup>-1</sup> s] |
|------------------------|----------------------------------------------|-------------|------------|-------|-------|------------------------------------------------------|
| Water vapor            | H <sub>2</sub> O                             |             | 7732-18-5  | 30    | vol-% | 2.10E-16                                             |
| Carbon dioxide         | CO <sub>2</sub>                              |             | 124-38-9   | 25    | vol-% |                                                      |
| Carbon monoxide        | CO                                           |             | 630-08-0   | 5000  | ppm   | 2.41E-13                                             |
|                        |                                              |             |            | 2     | vol-% |                                                      |
| Nitrous oxide          | N <sub>2</sub> O                             |             | 10024-97-2 | 200   | ppm   | 2.01E-16                                             |
| Nitrogen monoxide      | NO                                           |             | 10102-43-9 | 1000  | ppm   | 1.00E-11                                             |
| Nitrogen dioxide       | NO <sub>2</sub>                              |             | 19192-44-0 | 200   | ppm   | 1.06E-11                                             |
| Sulfur dioxide         | SO <sub>2</sub>                              |             | 7446-09-5  | 1000  | ppm   | 1.31E-12                                             |
| Carbonyl sulfide       | COS                                          |             | 483-58-1   | 100   | ppm   | 1.96E-15                                             |
| Ammonia                | NH <sub>3</sub>                              |             | 7664-41-7  | 500   | ppm   | 1.57E-13                                             |
| Hydrogen chloride      | HCl                                          |             | 7647-01-0  | 200   | ppm   | 7.86E-13                                             |
| Hydrogen cyanide       | HCN                                          |             | 74-90-8    | 100   | ppm   | 3.13E-14                                             |
| Hydrogen fluoride      | HF                                           |             | 7664-39-3  | 100   | ppm   |                                                      |
| Methane                | CH <sub>4</sub>                              |             | 74-82-8    | 1000  | ppm   | 6.28E-15                                             |
| Ethane                 | C <sub>2</sub> H <sub>6</sub>                | Alkane      | 74-84-0    | 200   | ppm   | 2.41E-13                                             |
| Propane                | C <sub>3</sub> H <sub>8</sub>                | Alkane      | 74-98-6    | 200   | ppm   | 1.10E-12                                             |
| Butane                 | C <sub>4</sub> H <sub>10</sub>               | Alkane      | 106-97-8   | 200   | ppm   | 2.33E-12                                             |
| Pentane                | C <sub>5</sub> H <sub>12</sub>               | Alkane      | 109-66-0   | 200   | ppm   | 3.80E-12                                             |
| Hexane                 | C <sub>6</sub> H <sub>14</sub>               | Alkane      | 110-54-3   | 200   | ppm   | 5.20E-12                                             |
| Heptane                | C <sub>7</sub> H <sub>16</sub>               | Alkane      | 142-82-5   | 200   | ppm   | 6.76E-12                                             |
| Octane                 | C <sub>8</sub> H <sub>18</sub>               | Alkane      | 111-65-9   | 200   | ppm   | 7.43E-12                                             |
| Acetylene              | C <sub>2</sub> H <sub>2</sub>                | Unsaturated | 75-86-2    | 200   | ppm   | 7.75E-13                                             |
| Ethylene               | C <sub>2</sub> H <sub>4</sub>                | Unsaturated | 74-85-1    | 200   | ppm   | 8.51E-12                                             |
| Propene                | C <sub>3</sub> H <sub>6</sub>                | Unsaturated | 115-07-1   | 200   | ppm   | 3.01E-11                                             |
| 1,3-Butadiene          | C <sub>4</sub> H <sub>6</sub>                | Unsaturated | 106-99-0   | 200   | ppm   | 6.93E-11                                             |
| Benzene                | C <sub>6</sub> H <sub>6</sub>                | Aromatic    | 71-43-2    | 200   | ppm   | 1.28E-12                                             |
| Toluene                | C <sub>7</sub> H <sub>8</sub>                | Aromatic    | 108-88-3   | 200   | ppm   | 6.16E-12                                             |
| m-Xylene               | C <sub>8</sub> H <sub>10</sub>               | Aromatic    | 108-38-3   | 200   | ppm   | 2.45E-11                                             |
| o-Xylene               | C <sub>8</sub> H <sub>10</sub>               | Aromatic    | 95-47-6    | 200   | ppm   | 1.47E-11                                             |
| p-Xylene               | C <sub>8</sub> H <sub>10</sub>               | Aromatic    | 106-42-3   | 200   | ppm   | 1.52E-11                                             |
| 1,2,3-Trimethylbenzene | C <sub>9</sub> H <sub>12</sub>               | Aromatic    | 526-73-8   | 200   | ppm   | 2.89E-11                                             |
| 1,2,4-Trimethylbenzene | C <sub>9</sub> H <sub>12</sub>               | Aromatic    | 95-63-6    | 200   | ppm   | 3.16E-11                                             |
| 1,35-Trimethylbenzene  | C <sub>9</sub> H <sub>12</sub>               | Aromatic    | 106-42-3   | 200   | ppm   | 5.98E-11                                             |
| Formic acid            | CH <sub>2</sub> O                            | Oxygenated  | 64-18-6    | 200   | ppm   | 4.50E-13                                             |
| Acetic acid            | C <sub>2</sub> H <sub>4</sub> O <sub>2</sub> | Oxygenated  | 64-19-7    | 200   | ppm   | 6.69E-13                                             |
| Formaldehyde           | CHOH                                         | Oxygenated  | 50-0-0     | 200   | ppm   | 9.38E-12                                             |
| Acetaldehyde           | C <sub>2</sub> H <sub>4</sub> O              | Oxygenated  | 75-07-0    | 200   | ppm   | 1.63E-11                                             |
| Methanol               | CH <sub>4</sub> O                            | Oxygenated  | 67-56-1    | 500   | ppm   | 9.28E-13                                             |
| Ethanol                | C <sub>2</sub> H <sub>6</sub> O              | Oxygenated  | 64-17-5    | 500   | ppm   | 3.24E-12                                             |
| Propanol               | C <sub>3</sub> H <sub>8</sub> O              | Oxygenated  | 71-23-8    | 500   | ppm   | 5.82E-12                                             |

**Table S2: Organic gaseous compounds identified from the RWC exhaust by PTR-ToF-MS and the applied reaction rates with H<sub>3</sub>O<sup>+</sup> (Cappellin et al., 2012).**

| m/z                               | Ion        | Suggested compound                    | k    | m/z                          | Ion         | Suggested compound                          | k    |
|-----------------------------------|------------|---------------------------------------|------|------------------------------|-------------|---------------------------------------------|------|
| <b>Aliphatic hydrocarbons</b>     |            |                                       |      | <b>Carbonyls - primary</b>   |             |                                             |      |
| 53.04                             | C4H4-H+    | Butenyne                              | 2.00 | 45.03                        | C2H4O-H+    | Acetaldehyde                                | 3.07 |
| 55.06                             | C4H6-H+    | 1,3-Butadiene                         | 1.80 | 55.02                        | C3H2O-H+    | 2-propynal                                  | 2.00 |
| 67.06                             | C5H6-H+    | 1,3-cyclopentadiene                   | 1.83 | 57.03                        | C3H4O-H+    | Acrolein                                    | 3.49 |
| 69.07                             | C5H8-H+    | Isoprene                              | 1.95 | 71.02                        | C3H2O2-H+   | Propiolic acid                              | 2.00 |
| 97.11                             | C7H12-H+   | Cycloheptene                          | 2.00 | 71.05                        | C4H6O-H+    | Methyl vinyl ketone, methacrolein           | 3.20 |
| 109.10                            | C8H12-H+   | e.g. Cyclohexene, 4-ethenyl-          | 2.00 | 73.03                        | C3H4O2-H+   | 2-Propenoic acid                            | 2.60 |
| 137.13                            | C10H16-H+  | Monoterpenes                          | 2.42 | 75.04                        | C3H6O2-H+   | Hydroxy-2-propanone                         | 2.33 |
| <b>Aromatic hydrocarbons</b>      |            |                                       |      | 83.01                        | C4H2O2-H+   | 3-Cyclobutene-1,2-dione                     | 2.00 |
| 79.05                             | C6H6-H+    | Benzene                               | 1.93 | 85.07                        | C5H8O-H+    | e.g. Pentenal                               | 2.00 |
| 93.07                             | C7H8-H+    | Toluene                               | 2.08 | 87.05                        | C4H6O2-H+   | e.g. 2,3- butadiene                         | 1.70 |
| 105.07                            | C8H8-H+    | Styrene                               | 2.27 | 99.08                        | C6H10O-H+   | e.g. Hexenal                                | 3.74 |
| 107.09                            | C8H10-H+   | Xylene, ethylbenzenes                 | 2.26 | 101.06                       | C5H8O2-H+   | e.g. Acetylacetone                          | 2.93 |
| 119.08                            | C9H10-H+   | e.g. Indane, methylstyrene            | 2.00 | 103.04                       | C4H6O3-H+   | Acetic anhydride                            | 2.00 |
| 121.10                            | C9H12-H+   | C3 benzenes; e.g. Cumene              | 2.40 | 103.08                       | C5H10O2-H+  | e.g. Methyl-butanoic acid                   | 2.00 |
| 129.07                            | C10H8-H+   | Naphthalene                           | 2.45 | 117.02                       | C4H4O4-H+   | Fumaric acid                                | 2.00 |
| 143.09                            | C11H10-H+  | Methylnaphthalene                     | 2.71 | 117.06                       | C5H8O3-H+   | e.g. Acetyloxypentanone                     | 2.00 |
| 155.08                            | C12H10-H+  | e.g. Acenaphthene                     | 2.82 | <b>Carbonyls - secondary</b> |             |                                             |      |
| 167.08                            | C13H10-H+  | Fluorene                              | 2.88 | 59.05                        | C3H6O-H+    | Acetone, propanal                           | 3.20 |
| <b>Phenolic compounds</b>         |            |                                       |      | 61.03                        | C2H4O2-H+   | Acetic acid, glycolaldehyde                 | 2.30 |
| 95.05                             | C6H6O2-H+  | Phenol                                | 2.20 | 73.07                        | C4H8O-H+    | 2-butanone and 2-methylpropanal             | 3.12 |
| 109.07                            | C7H8O-H+   | Cresols                               | 3.20 | 77.02                        | C2H4O3-H+   | Acetic acid, hydroxy-                       | 2.00 |
| 111.04                            | C6H6O2-H+  | Benzenediols                          | 2.00 | 89.03                        | C3H4O3-H+   | E.g. Acetic acid anhydride with formic acid | 2.00 |
| 123.08                            | C8H10O-H+  | Dimethylphenol                        | 2.00 | 89.06                        | C4H8O2-H+   | Acetoin                                     | 4.23 |
| 125.06                            | C7H8O2-H+  | Guaiacol                              | 2.00 | 99.01                        | C4H2O3-H+   | Maleic anhydride                            | 2.00 |
| 139.04                            | C7H6O3-H+  | e.g. Salicylic acid                   | 2.00 | 101.02                       | C4H4O3-H+   | Succinic anhydride                          | 2.00 |
| 139.08                            | C8H10O2-H+ | Creosol, Trosol                       | 2.00 | 105.04                       | C4H8O3-H+   | e.g. Acetic acid, methoxy-                  | 2.00 |
| 153.07                            | C8H8O3-H+  | e.g. Methoxy-benzoic acid             | 2.00 | <b>Other CHO</b>             |             |                                             |      |
| <b>Furanic compounds</b>          |            |                                       |      | 47.05                        | C2H6O-H+    | Ethanol                                     | 2.11 |
| 69.03                             | C4H4O-H+   | Furan                                 | 1.70 | 49.03                        | CH4O2-H+    | Methyl peroxide or methanediol              | 2.00 |
| 83.05                             | C5H6O-H+   | Methylfurans                          | 2.00 | 63.04                        | C2H6O2-H+   | ethanediol                                  | 1.47 |
| 85.03                             | C4H4O2-H+  | Furanone                              | 2.00 | 77.05                        | C3H8O2-H+   | e.g. Ethanol 2-methoxy- ; 1,3-Propanediol   | 3.50 |
| 97.03                             | C5H4O2-H+  | Furfural                              | 3.95 | 81.04                        | C5H4O-H+    | 2,4-Cyclopentadiene-1-one                   | 2.00 |
| 97.07                             | C6H8O-H+   | Dimethyl- & ethyl furan               | 2.00 | 91.07                        | C4H10O2-H+  | Butanediols                                 | 2.00 |
| 99.04                             | C5H6O2-H+  | Furfuryl alcohol                      | 2.00 | 111.08                       | C7H10O-H+   | e.g. Heptenediol or trimethylfuran          | 2.00 |
| 119.05                            | C8H6O-H+   | Benzo-furan                           | 2.00 | 113.02                       | C5H4O3-H+   | e.g. 2-furoic acid                          | 2.00 |
| 125.02                            | C6H4O3-H+  | 2,5-Furandicarboxaldehyde             | 2.00 | 113.06                       | C6H8O2-H+   | eg. Methylcyclohexanone                     | 2.00 |
| 127.04                            | C6H6O3-H+  | 5-Hydroxymethylfurfural               | 2.00 | 115.04                       | C5H6O3-H+   | e.g. Hydroxymethylfuranone                  | 2.00 |
| <b>Nitroaromatics</b>             |            |                                       |      | 115.08                       | C7H10O2-H+  |                                             | 2.00 |
| 140.03                            | C6H5NO3-H+ | Nitrophenols                          | 2.00 | 115.11                       | C7H14O-H+   | e.g. Heptanal                               | 2.83 |
| 154.06                            | C7H7NO3-H+ | e.g. Nitrocresol                      | 2.00 | 117.09                       | C6H12O2-H+  |                                             | 2.00 |
| <b>Other oxygenated aromatics</b> |            |                                       |      | 127.08                       | C7H10O2-H+  |                                             | 2.00 |
| 107.05                            | C7H6O-H+   | Benzaldehyde                          | 3.73 | 139.11                       | C9H14O-H+   |                                             | 2.00 |
| 109.03                            | C6H4O2-H+  | Benzoquinones                         | 1.99 | 145.05                       | C6H8O4-H+   | e.g. Dimethyl fumarate                      | 2.00 |
| 121.07                            | C8H8O-H+   | E.g. Acetophenone                     | 3.36 | 157.08                       | C8H12O3-H+  |                                             | 2.00 |
| 123.04                            | C7H6O2-H+  | Benzoic acid                          | 2.68 | <b>CHNO</b>                  |             |                                             |      |
| 133.06                            | C9H8O-H+   | e.g. Cinnamic acid                    | 2.00 | 44.01                        | CHNO-H+     | Isocyanic acid                              | 2.00 |
| 135.04                            | C8H6O2-H+  | e.g. Isophthalaldehyde, phenylglyoxal | 2.00 | 58.03                        | C2H3NO-H+   | Methyl isocyanate                           | 2.00 |
| 135.08                            | C9H10O-H+  | e.g. 4-Ethylbenzaldehyde              | 2.00 | 60.05                        | C2H5NO-H+   | e.g. Acetamide                              | 2.00 |
| 137.06                            | C8H8O2-H+  | e.g. Benzenecetic acid                | 2.00 | 62.03                        | CH3NO2-H+   | e.g. Nitromethane, methyl nitrite           | 2.00 |
| 141.05                            | C7H8O3-H+  |                                       | 2.00 | 70.03                        | C3H3NO-H+   | e.g. Vinyl isocyanate                       | 2.00 |
| 147.06                            | C9H6O2-H+  | e.g. Coumarin                         | 2.00 | 74.03                        | C2H3NO2-H+  | e.g. Nitroethylene                          | 2.00 |
| 149.02                            | C8H4O3-H+  | Phthalic anhydride                    | 2.00 | 74.06                        | C3H7NO-H+   | Propanamide                                 | 2.00 |
| 151.04                            | C8H6O3-H+  | e.g. Benzoylformic acid               | 2.00 | 84.05                        | C4H5NO-H+   |                                             | 2.00 |
| 151.08                            | C9H10O2-H+ | e.g. Hydrocinnamic acid               | 2.00 | 86.03                        | C3H3NO2-H+  | Acetic acid, cyano-                         | 2.00 |
| 151.11                            | C10H14O-H+ | e.g. Verbenone                        | 2.00 | 86.07                        | C4H7NO-H+   | e.g. Methacrylamide                         | 2.00 |
| 159.04                            | C10H6O2-H+ | Naphthalenedione                      | 2.00 | 88.05                        | C3H5NO2-H+  | Nitropropene                                | 2.00 |
| 163.04                            | C9H6O3-H+  |                                       | 2.00 | 88.08                        | C4H9NO-H+   |                                             | 2.00 |
| 169.07                            | C12H8O-H+  | e.g. dibenzofuran                     | 2.00 | 96.06                        | C5H5NO-H+   | Pyridine-N-oxide                            | 2.00 |
| <b>CHN</b>                        |            |                                       |      | 100.04                       | C4H5NO2-H+  |                                             | 2.00 |
| 42.04                             | C2H3N-H+   | Acetonitrile                          | 3.90 | 112.05                       | C5H5NO2-H+  |                                             | 2.00 |
| 54.04                             | C3H3N-H+   | Propenenitrile                        | 2.00 | 114.02                       | C4H3NO2-H+  | Nitrofurane                                 | 2.00 |
| 56.05                             | C3H5N-H+   | e.g. Propanenitrile                   | 2.00 | 114.06                       | C5H7NO2-H+  | e.g. Ethyl cyanoacetate                     | 2.00 |
| 68.05                             | C4H5N-H+   | e.g. Pyrrole                          | 2.38 | 120.05                       | C7H5NO-H+   | e.g. Benzisoxazole                          | 2.00 |
| 70.07                             | C4H7N-H+   | e.g. Butanenitrile                    | 2.00 | 122.02                       | C2H3NO5 -H+ | peroxyacetyl nitrate                        | 2.00 |
| 84.09                             | C5H9N-H+   | e.g. Pentanenitrile                   | 2.00 | 122.07                       | C7H7NO-H+   | e.g. Benzamide                              | 2.00 |
| 100.08                            | C5H9N3-H+  |                                       | 2.00 | 124.05                       | C6H5NO2-H+  | Nitrobenzene                                | 2.00 |
| 104.05                            | C7H5N-H+   | Benzonitrile                          | 2.00 | 136.04                       | C7H5NO2-H+  | e.g. 2-Furoylacetonitrile                   | 2.00 |
| 118.06                            | C8H7N-H+   | Indole                                | 2.00 |                              |             |                                             |      |

**Table S3: Polycyclic aromatic compounds included in the SP-HR-ToF-AMS HR-PAH analysis. Analysis was based on the grouping by Herring et al. (2015) and adapted for residential wood combustion exhaust with an addition of polycyclic aromatic compounds typically released from RWC (Avagyan et al., 2016; Bertrand et al., 2018; Bruns et al., 2015; Czech et al., 2018; Miersch et al., 2019).**

| Unsubstituted PAHs<br>(UnSubPAH) | Oxygenated PAHs<br>(OPAH) | Methylated PAHs<br>(MPAH) | Nitrogen-substituted PAHs<br>(NPAH) | Amino PAHs<br>(APAH) |
|----------------------------------|---------------------------|---------------------------|-------------------------------------|----------------------|
| C10H8                            | C9H8O                     | C11H10                    | C10H7NO2                            | C16H11N              |
| C12H8                            | C11H8O                    | C12H12                    | C12H9NO2                            | C18H13NO             |
| C12H10                           | <b>C11H8O2*</b>           | C13H12                    | C13H9NO2                            | C20H13N              |
| C13H10                           | C10H6O2                   | C14H12                    | C14H9NO2                            | C21H13N              |
| C14H8                            | C12H8O                    | C15H12                    | C16H9NO2                            |                      |
| C14H10                           | C13H8O                    | C15H14                    | C13H8N2O4                           |                      |
| C15H10                           | C13H10O                   | C16H14                    | C18H11NO2                           |                      |
| C16H10                           | <b>C12H6O3*</b>           | C17H16                    |                                     |                      |
| C17H12                           | C12H6O2                   | <b>C18H14*</b>            |                                     |                      |
| C18H10                           | C12H8O2                   | C18H18                    |                                     |                      |
| C18H12                           | <b>C12H8O3*</b>           | C19H14                    |                                     |                      |
| C20H10                           | C14H10O                   | C20H16                    |                                     |                      |
| C20H12                           | C13H8O2                   | C21H16                    |                                     |                      |
| C22H12                           | C15H8O                    |                           |                                     |                      |
| C22H14                           | C14H8O2                   |                           |                                     |                      |
| <b>C24H12*</b>                   | <b>C15H8O2*</b>           |                           |                                     |                      |
|                                  | C16H8O2                   |                           |                                     |                      |
|                                  | <b>C16H10O*</b>           |                           |                                     |                      |
|                                  | <b>C17H10O*</b>           |                           |                                     |                      |
|                                  | C19H10O                   |                           |                                     |                      |
|                                  | C18H10O2                  |                           |                                     |                      |

**\* added for RWC**

## Section S2 – OH exposure and external OH reactivity of RWC exhaust

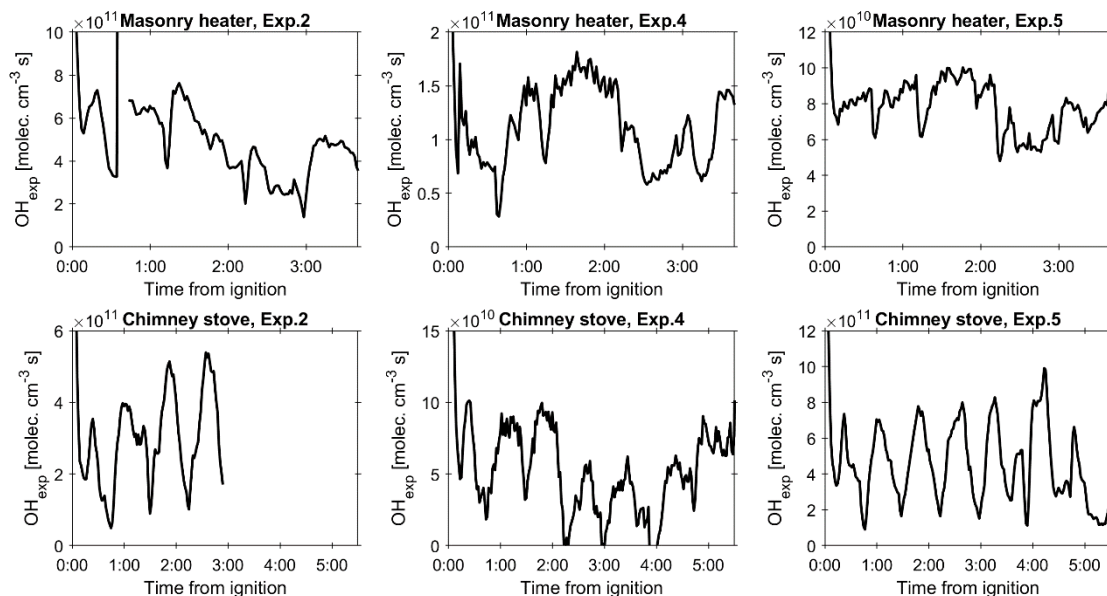

**Figure S1: OH exposure during photochemical aging experiments based on the butanol-d9 decay in the PEAR OFR.**

External OH reactivity ( $\text{OHR}_{\text{ext}} = \sum k_i \cdot c_i$ ; Li et al., 2015) was calculated from the compounds measured by FTIR from the primary exhaust, using their reaction rate constants with OH ( $k_i$ ; Table S1) and dilution corrected concentrations ( $c_i$ ) upstream the PEAR OFR. In addition, the butanol-d9, which was used as a marker to determine the OH-exposure, caused an additional  $\text{OHR}_{\text{ext}}$  of  $9 \text{ s}^{-1}$  (5-7 % of total) for masonry heater experiments,  $7 \text{ s}^{-1}$  (2 %) for chimney stove experiments 2 and 4 (2 %), and  $17 \text{ s}^{-1}$  in chimney stove experiment 5 (1 % of total).

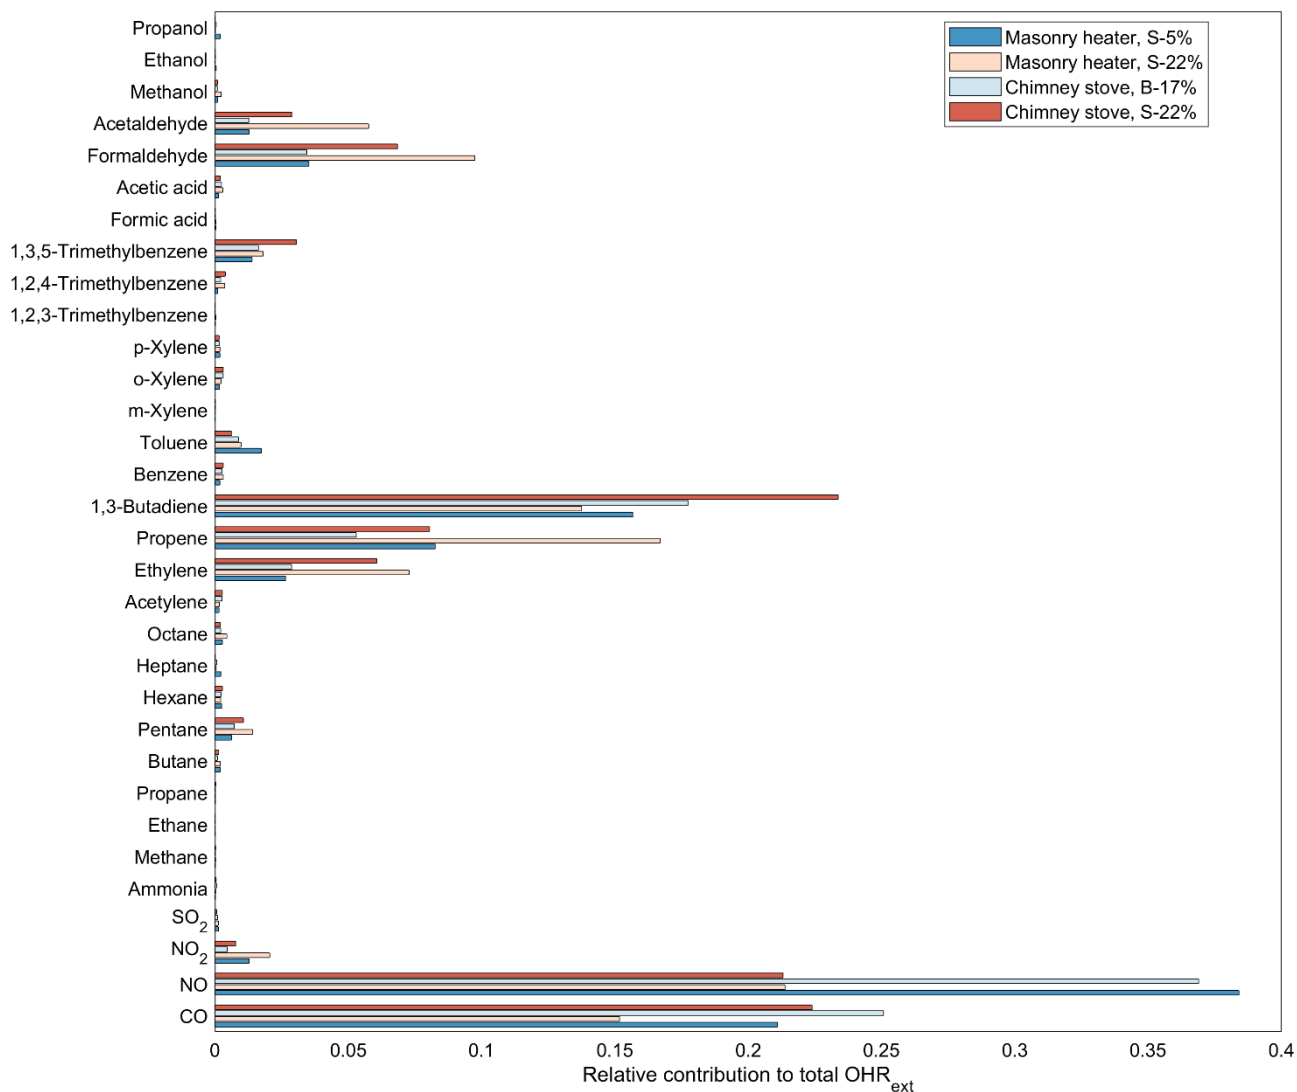

**Figure S2: Average relative contributions of the gaseous compounds measured by FTIR to the external OH reactivity of primary RWC exhaust. Note that only the compounds in the exhaust itself are included, and the additional OH<sub>ext</sub> by butanol-d9 is not considered here.**

## Section S3 – Primary emission

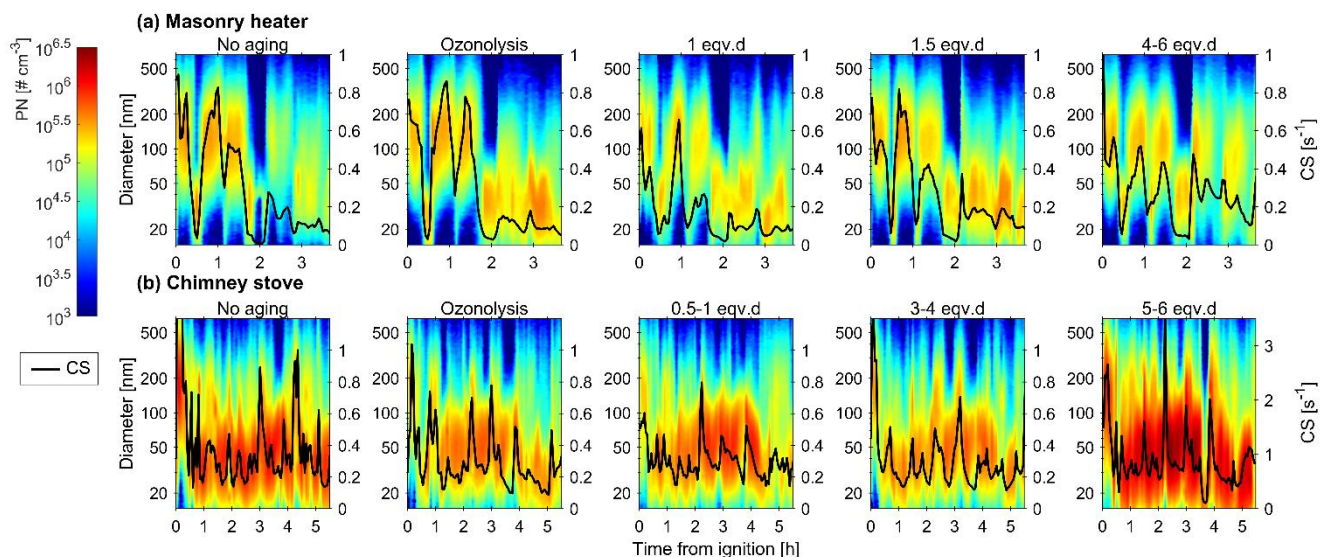

**Figure S3:** Size distributions of diluted primary aerosol entering the PEAR OFR reactor as a function of time, and condensation sinks (CS) in the PEAR OFR based on average size distributions measured with SMPS before and after the PEAR OFR.

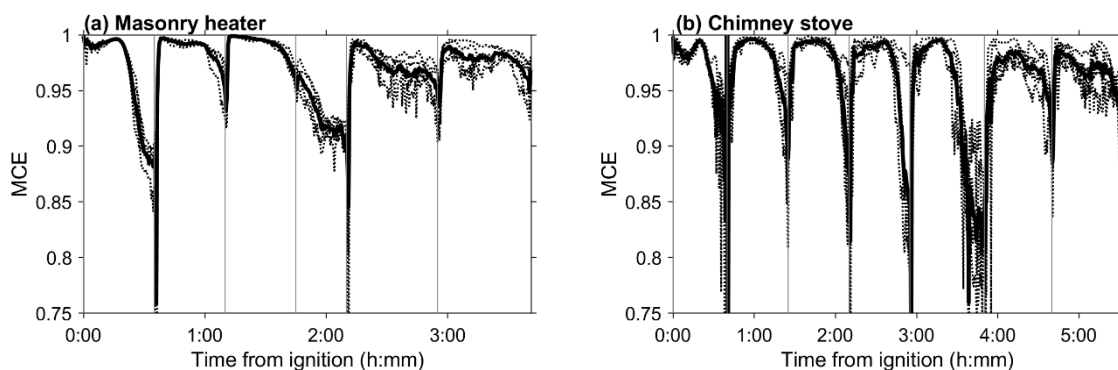

**Figure S4:** Modified combustion efficiency ( $MCE = \Delta CO_2 / (\Delta CO_2 + \Delta CO)$ ) during the experiments. Averages of the experiments ( $n=5$ ) are shown with the solid lines and distinct experiments are shown with the dotted lines.

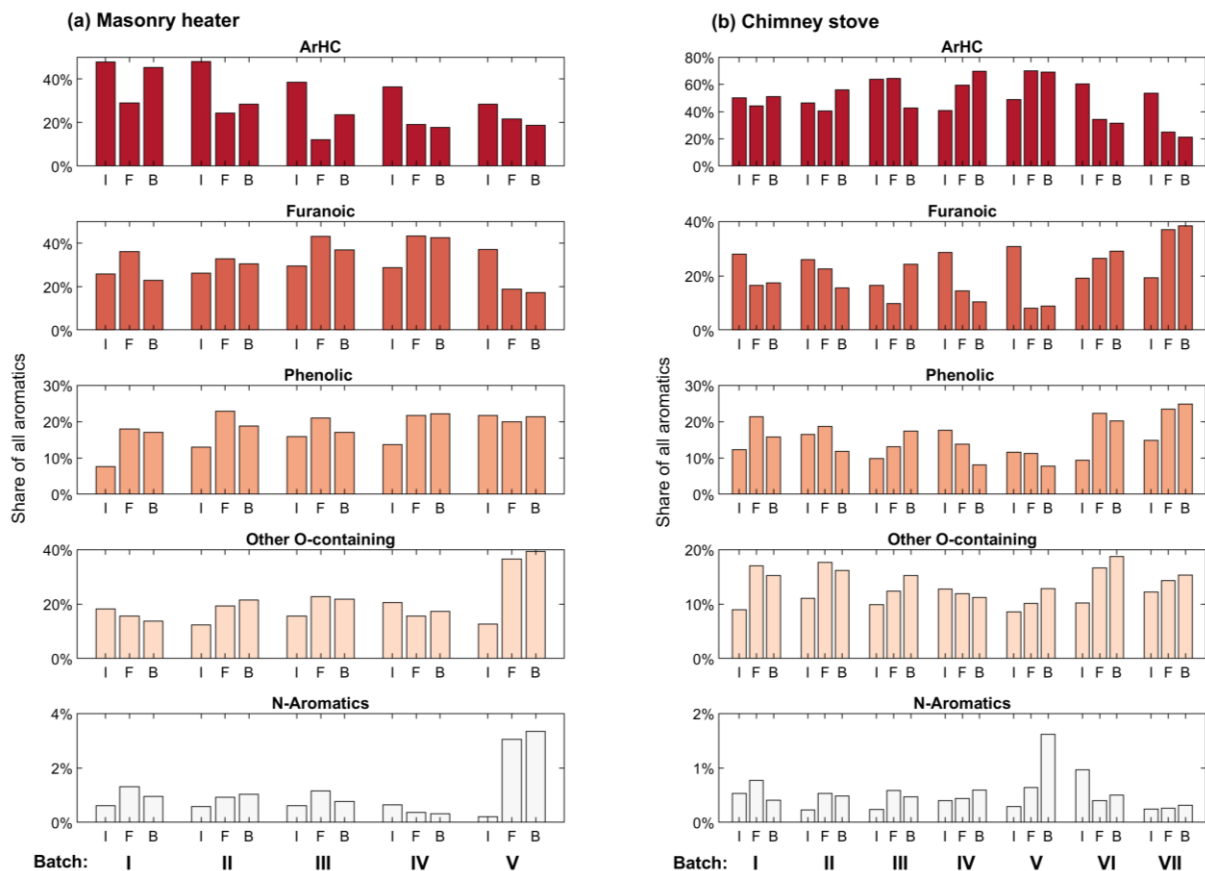

**Figure S5: Average shares of the aromatic compound groups measured by PTR-ToF-MS from unaged aerosol, in relation to the total aromatic concentration (ppm:ppm) during different combustion phases (I = ignition, F = flaming, B = burnout) for each batch.**

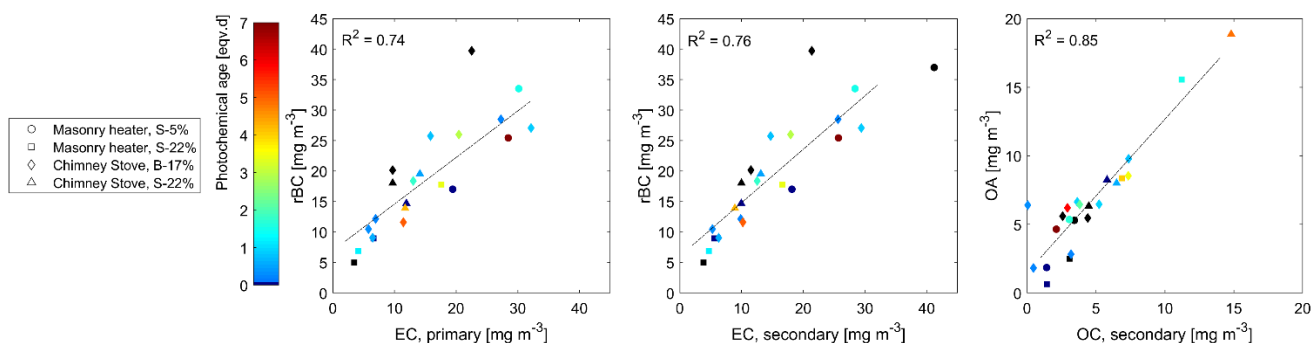

**Figure S6: Correlations between variables measured by SP-HR-ToF-AMS after the PEAR OFR and by thermal-optical analyses, respectively: (a) refractory black carbon (rBC) and elemental carbon (EC) before the PEAR OFR; (b) rBC and EC after the PEAR OFR; (c) organic aerosol (OA) and organic carbon (OC) after the PEAR OFR.**

**Table S4: Average ( $\pm$  standard deviation) concentrations of gaseous emissions in the primary flue gas measured by FTIR for each experiment type (five experiments each). No O<sub>2</sub> reduction. Concentrations as in dry flue gas, excluding H<sub>2</sub>O.**

| Compound          | unit                | Masonry heater |                 | Chimney stove   |                | p*                                  | p*                                  | p**                                             |
|-------------------|---------------------|----------------|-----------------|-----------------|----------------|-------------------------------------|-------------------------------------|-------------------------------------------------|
|                   |                     | S-5%           | S-22%           | B-17%           | S-22%          | Masonry heater;<br>S-5% v.<br>S-22% | Chimney stove;<br>B-17% v.<br>S-22% | S-22%;<br>Masonry heater<br>v. Chimney<br>stove |
| Water vapor       | vol-%               | 4.5 $\pm$ 0.3  | 4.1 $\pm$ 0.4   | 7.2 $\pm$ 0.4   | 6.4 $\pm$ 0.5  | <0.01                               | <0.01                               | <0.01                                           |
| Carbon dioxide    | vol-%               | 4.6 $\pm$ 0.1  | 3.26 $\pm$ 0.08 | 6.2 $\pm$ 0.3   | 5.9 $\pm$ 0.4  | <0.01                               | 0.05                                | <0.01                                           |
| Carbon monoxide   | ppm                 | 638 $\pm$ 26.5 | 735 $\pm$ 129   | 1680 $\pm$ 249  | 1880 $\pm$ 144 | 0.24                                | 0.28                                | <0.01                                           |
| Nitrogen monoxide | ppm                 | 25.6 $\pm$ 1.8 | 21.4 $\pm$ 2.6  | 45.9 $\pm$ 2.9  | 31.6 $\pm$ 3.7 | <0.01                               | <0.01                               | <0.01                                           |
| Nitrogen dioxide  | ppm                 | 1.0 $\pm$ 0.4  | 2.7 $\pm$ 1.1   | 1.3 $\pm$ 0.7   | 2.6 $\pm$ 1.6  | 0.03                                | 0.08                                | 0.98                                            |
| Sulfur dioxide    | ppm                 | 0.5 $\pm$ 0.3  | 0.6 $\pm$ 0.3   | 1.4 $\pm$ 0.3   | 0.9 $\pm$ 0.1  | 0.05                                | <0.01                               | 0.1                                             |
| Ammonia           | ppm                 | 1 $\pm$ 0.3    | 1.9 $\pm$ 0.3   | 6.2 $\pm$ 0.4   | 5.1 $\pm$ 0.5  | <0.01                               | 0.01                                | <0.01                                           |
| Methane           | mgC m <sup>-3</sup> | 10.5 $\pm$ 0.5 | 23.6 $\pm$ 5.6  | 28.7 $\pm$ 4.5  | 46.3 $\pm$ 4.4 | <0.01                               | 0.01                                | <0.01                                           |
| Non-methane OGC   | mgC m <sup>-3</sup> | 42.6 $\pm$ 9.2 | 101 $\pm$ 24.6  | 89.4 $\pm$ 11.3 | 148.3 $\pm$ 23 | 0.01                                | <0.01                               | 0.05                                            |
| Alkanes           | mgC m <sup>-3</sup> | 9.7 $\pm$ 2.6  | 23.8 $\pm$ 6.6  | 16.9 $\pm$ 3    | 29.5 $\pm$ 6.7 | <0.01                               | 0.01                                | 0.31                                            |
| Unsaturated       | mgC m <sup>-3</sup> | 12.8 $\pm$ 2.9 | 33.1 $\pm$ 8.1  | 30.8 $\pm$ 4.7  | 54.2 $\pm$ 5.4 | <0.01                               | <0.01                               | <0.01                                           |
| Aromatics         | mgC m <sup>-3</sup> | 14.2 $\pm$ 3.5 | 20.7 $\pm$ 2.6  | 27.9 $\pm$ 4.9  | 36.0 $\pm$ 3.4 | 0.02                                | 0.02                                | <0.01                                           |
| Oxygenated        | mgC m <sup>-3</sup> | 5.6 $\pm$ 1.2  | 21.9 $\pm$ 8.1  | 13.3 $\pm$ 0.6  | 27.1 $\pm$ 8.9 | 0.01                                | 0.04                                | 0.51                                            |

\* paired Student's t-test; comparison of averages of the consecutive experiments; \*\* unpaired Student's t-test of independent experiments

## Section S4 – Conditions in the PEAR OFR

### S4.1. Photochemical aging conditions

OH exposure during photochemical aging was measured directly from the decay of externally added butanol-d9 (Barnet et al., 2012). Timeseries for the OH exposures during each experiment are shown in Figure S1. The relevance of other reaction pathways in the PEAR OFR, including photolysis as well as exposure to ozone, excited singlet oxygen ( $O(^1D)$ ), and triplet atomic oxygen ( $O(^3P)$ ), was estimated based on the estimation equations by Peng et al. (2016) (Table S5). The conditions in the PEAR OFR were assessed utilising the measured OH exposure ( $OH_{exp}$ ), initial  $O_3$  input concentration ( $O_{3, init}$ ), residence time in the PEAR OFR (RT; 139 s), and water mixing ratio ( $H_2O$ ; 0.015 for 45 % relative humidity). Average exposures during each experiment are shown in Table S6 and their relevance towards ambient atmospheric conditions are displayed in Figure S8.

As an example of the relevance of the different reaction pathways towards OGC fate, their importance was assessed for two important SOA precursors common for RWC: benzene and toluene (Fig. S10). The ratio of degradation by photolysis ( $D_{flux}$ ) and reactions with alternative oxidants ( $D_x$ ) to the degradation by OH reactions were calculated with Eq. (S1-S2), which show the inverse relationship between the importance of the pathway and the ratio of the photoabsorption cross section ( $\sigma_{abs}$ ) or reaction rate of the compound with the considered radical ( $k[X]_{OGC}$ ) to its reaction rate with OH ( $k[OH]_{OGC}$ ).

$$D_{flux} = \frac{flux_{exp}}{[OH]_{exp}} * \frac{\sigma_{abs,OGC}}{k[OH]_{OGC}} \quad (S1)$$

$$D_x = \frac{[X]_{exp}}{[OH]_{exp}} * \frac{k[X]_{OGC}}{k[OH]_{OGC}} \quad (S2)$$

The absorption cross sections and reactivities used for the exemplary pathway estimations for toluene and benzene are listed in Table S7. The total degradation in relation to degradation by OH was calculated with Eq. (S3) by considering reactions with OH,  $O_3$ , and  $O(^3P)$  and photolysis.

$$D_{total} = 1 + D_{flux} + D_{O_3} + D_{O(^3P)} \quad (S3)$$

**Table S5: Estimation equations used for determination of photon flux ( $F_{254nm}$ ),  $O(^3P)$ ,  $O(^1D)$ , and  $O_3$  exposures, based on Peng et al. (2016).**

| Reactant           | Exposure estimation equation                                                                                                                                                                                                                                                                                                                                                                                                              | eq.no |
|--------------------|-------------------------------------------------------------------------------------------------------------------------------------------------------------------------------------------------------------------------------------------------------------------------------------------------------------------------------------------------------------------------------------------------------------------------------------------|-------|
| Photon flux        | $flux_{254nm,exp} = 10^{\left(\frac{1.0238 + \sqrt{(-1.0238)^2 - 4 * 0.060786 * c}}{2 * 0.060786}\right)}$ $\text{where } c = - \left[ \log_{10} \left( OH_{exp} * \frac{180}{RT} \right) - \left\{ 15.514 + 0.79292 * \log_{10}(H_2O) + 0.023076 * \log_{10}(H_2O)^2 - \right. \right.$ $\left. \left. \log_{10} \left( 1 + e^{\frac{-0.42602 - \log_{10} \left( \frac{O_3,init}{OHR_{ext}} \right)}{0.39479}} \right) \right\} \right]$ | (S4)  |
| $O(^1D)$           | $\log_{10}(O(^1D)_{exp}) = 3.7371 + 0.1608 * \log_{10} \left( -\log_{10} d^{\frac{180}{RT}} \right)$ $- 1.1344 * \log_{10} H_2O + 0.59179 * \log_{10} O_{3,init}$ $- 0.17019 * \log_{10} \left( -\log_{10} d^{\frac{180}{RT}} \right) * \log_{10} H_2O$ $- 0.37983 * \log_{10} \left( -\log_{10} d^{\frac{180}{RT}} \right)^2 + 0.099941 * \log_{10} OHR_{ext}$                                                                           | (S5)  |
| $O(^3P)$           | $\log_{10}(O(^3P)_{exp}) = 7.6621 + 0.16135 * \log_{10} \left( -\log_{10} d^{\frac{180}{RT}} \right)$ $- 1.1342 * \log_{10} H_2O + 0.59182 * \log_{10} O_{3,init}$ $- 0.17007 * \log_{10} \left( -\log_{10} d^{\frac{180}{RT}} \right) * \log_{10} H_2O$ $- 0.3797 * \left( \log_{10} \left( -\log_{10} d^{\frac{180}{RT}} \right) \right)^2 + 0.099902 * \log_{10} (OHR_{ext})$                                                          | (S6)  |
| $O_3$              | $\log_{10}(O_{3,exp}) = 15.559 + \log_{10} O_{3,init} + 0.42073 * \log_e(d^{180/RT})$                                                                                                                                                                                                                                                                                                                                                     | (S7)  |
| for Eq. S5–<br>S7: | $d = \left( 10^{-10 \left( \log_{10}(OH_{exp}/RT*180) - 13.322 + 0.22101 * \left( \frac{OHR_{ext}}{O_{3,init}} \right)^{0.43529} \right)} \right)^{RT/180}$                                                                                                                                                                                                                                                                               | (S8)  |

**Table S6: Average radical exposures in the PEAR OFR during photochemical aging experiments.**

|                   | Exp. | O <sub>3</sub> input<br>[ppm] | photon flux<br>[photons cm <sup>-2</sup> ] | Fuel   | OH <sub>exp</sub><br>[s cm <sup>-3</sup> ] | O( <sup>1</sup> D) <sub>exp</sub><br>[s cm <sup>-3</sup> ] | O( <sup>3</sup> P) <sub>exp</sub><br>[s cm <sup>-3</sup> ] | O <sub>3</sub> exp<br>[s cm <sup>-3</sup> ] |
|-------------------|------|-------------------------------|--------------------------------------------|--------|--------------------------------------------|------------------------------------------------------------|------------------------------------------------------------|---------------------------------------------|
| Masonry<br>heater | 2    | 2.3                           | 8.6E+15                                    | S-5%   | 5.8E+11                                    | 1.3E+06                                                    | 1.1E+10                                                    | 2.3E+15                                     |
|                   |      |                               |                                            | S-22%  | 3.5E+11                                    | 1.2E+06                                                    | 9.9E+09                                                    | 2.9E+15                                     |
|                   | 4    | 2.2                           | 2.8E+15                                    | S-5%   | 1.5E+11                                    | 5.2E+05                                                    | 4.4E+09                                                    | 5.2E+15                                     |
|                   |      |                               |                                            | S-22%  | 1.3E+11                                    | 8.6E+05                                                    | 7.2E+09                                                    | 4.0E+15                                     |
|                   | 5    | 1.8                           | 1.4E+15                                    | S-5%   | 8.1E+10                                    | 3.0E+05                                                    | 2.5E+09                                                    | 4.9E+15                                     |
|                   |      |                               |                                            | S-22%  | 6.3E+10                                    | 3.9E+05                                                    | 3.3E+09                                                    | 4.6E+15                                     |
| Chimney<br>stove  | 2    | 4.3                           | 5.8E+15                                    | B-17%  | 3.1E+11                                    | 1.6E+06                                                    | 1.3E+10                                                    | 6.5E+15                                     |
|                   |      |                               |                                            | S-22%* | not meas.                                  | not meas.                                                  | not meas.                                                  | not meas.                                   |
|                   | 4    | 3.6                           | 1.1E+15                                    | B-17%  | 5.4E+10                                    | 3.0E+05                                                    | 2.6E+09                                                    | 1.1E+16                                     |
|                   |      |                               |                                            | S-22%  | 6.1E+10                                    | 4.1E+05                                                    | 3.4E+09                                                    | 1.0E+16                                     |
|                   | 5    | 11                            | 1.1E+16                                    | B-17%  | 5.0E+11                                    | 4.4E+06                                                    | 3.7E+10                                                    | 8.8E+15                                     |
|                   |      |                               |                                            | S-22%  | 5.0E+11                                    | 5.2E+06                                                    | 4.4E+10                                                    | 6.7E+15                                     |

\*Direct OH exposure measurements not available for Chimney stove Exp.2 S-22%; approximately similar as in Exp.2 B-17%.

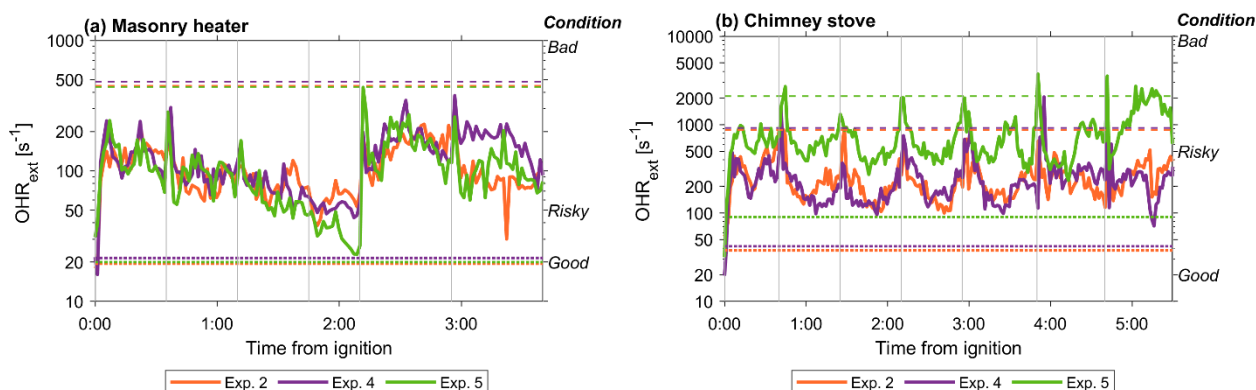

**Figure S7: External OH reactivity in the PEAR OFR during photochemical aging experiments, including  $OHR_{ext}$  by butanol-d9 and the compounds measured by FTIR. Risk levels for  $OHR_{ext}$  determined by Peng and Jimenez (2017) are marked with dotted (good/risky:  $\frac{Flux_{254nm} \text{ exposure}}{OH \text{ exposure}} > 4 \times 10^5 \text{ cm s}^{-1}$ ) and dashed (risky/bad:  $\frac{Flux_{254nm} \text{ exposure}}{OH \text{ exposure}} > 10^7 \text{ cm s}^{-1}$ ) lines for each experiment.**

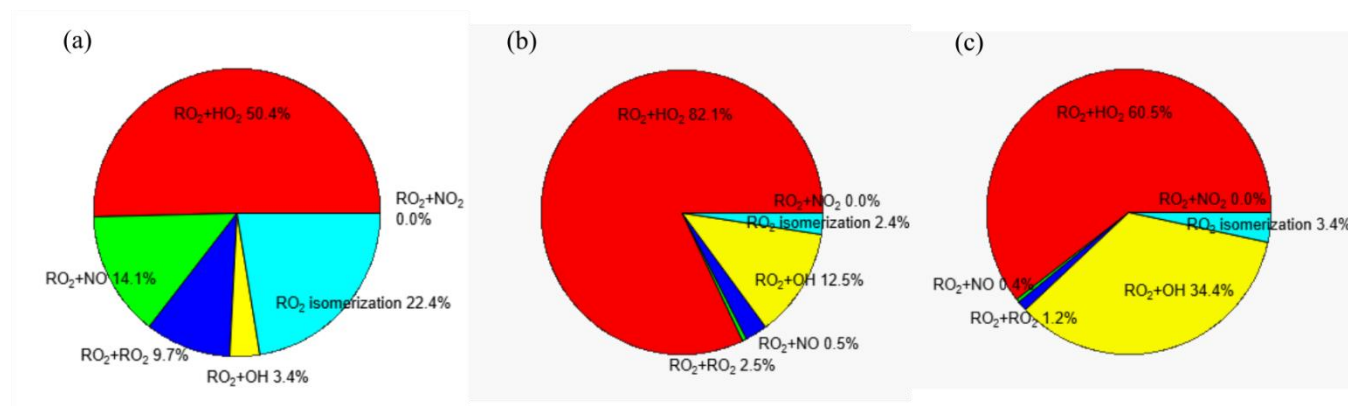

**Figure S8: Rough estimation of the relative shares of  $RO_2$  fates in (a) ambient air at  $OHR_{ext} = 10$ , and (b-c) in the PEAR OFR during the first minute of aging, during which majority of the volatile organic compounds are expected to have reacted. Shown for two experiments with different aging conditions: (b) high OH exposure (masonry heater Exp. 2) and (c) high  $OHR_{ext}$  (chimney stove Exp. 5). Based on the  $RO_2$  Fate Estimator by Peng et al. (2019).**

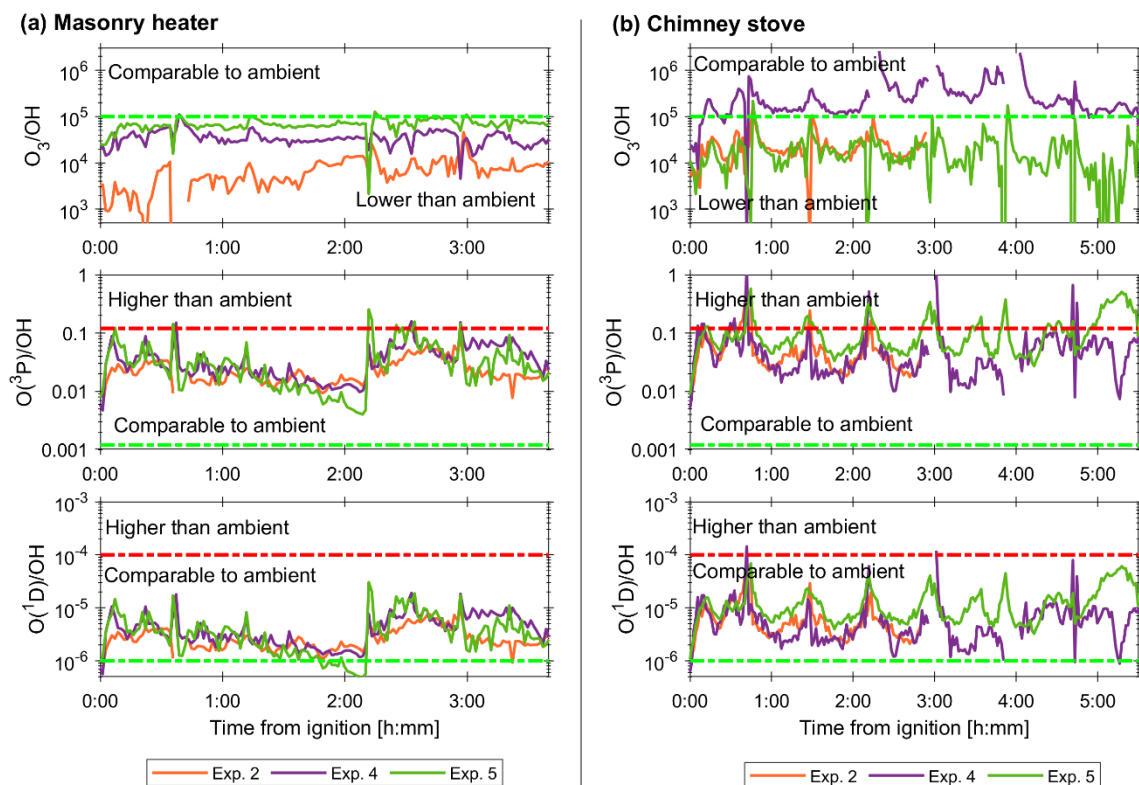

**Figure S9: Ratios of alternative reaction pathways to the OH exposure and their relevance towards ambient conditions. Ambient ratios as in Peng et al. (2016).**

**Table S7: Absorption cross sections ( $\sigma_{\text{abs}}$ ,  $\text{cm}^2 \text{ molecule}^{-1}$ ) and reaction rates ( $\text{cm}^3 \text{ molec.}^{-1} \text{ s}$ ) of some of the major volatile organic compounds from RWC towards oxidants in the PEAR OFR.**

|                                     | Benzene               | Toluene               | Phenol                | Furan                 | Acetic acid           | Acetaldehyde          | Isoprene              | References                                                                                                       |
|-------------------------------------|-----------------------|-----------------------|-----------------------|-----------------------|-----------------------|-----------------------|-----------------------|------------------------------------------------------------------------------------------------------------------|
| $\sigma_{\text{abs}, 254\text{nm}}$ | 3.0E-19               | 2.3E-19               | 1.6E-18               | 7.1E-19*              | 4.8E-21               | 1.5e-20               | 5.3E-20               | Keller-Rudek et al. (2015); * at 225nm                                                                           |
| $k[\text{OH}]$                      | 1.8E-12 <sup>A</sup>  | 6.16E-12 <sup>A</sup> | 1.00E-11 <sup>B</sup> | 4.04E-11 <sup>A</sup> | 8.00E-13 <sup>C</sup> | 1.62E-11 <sup>A</sup> | 1.00E-10 <sup>A</sup> | A: (Atkinson, 1986), B: (Baulch et al., 1992); C: (Atkinson. et al., 2001)                                       |
| $k[\text{O}_3]$                     | 1.72E-22 <sup>A</sup> | 3.90E-22 <sup>A</sup> |                       | 2.42E-18 <sup>B</sup> |                       | 3.40E-20 <sup>c</sup> | 1.29E-17 <sup>D</sup> | A: (Toby et al., 1985), B: (Atkinson et al., 1983) C: (Stedman and Niki, 1973), D: (Grosjean and Grosjean, 1996) |
| $k[\text{O}(^3\text{P})]$           | 1.99E-14 <sup>A</sup> | 7.63E-14 <sup>A</sup> | 1.56E-13 <sup>B</sup> |                       | 1.73E-15 <sup>C</sup> | 4.58E-13 <sup>B</sup> | 3.50E-11              | A: (Cvetanović, 1987), B: (Baulch et al., 1994), C: (Herron, 1988), (Paulson et al., 1995)                       |

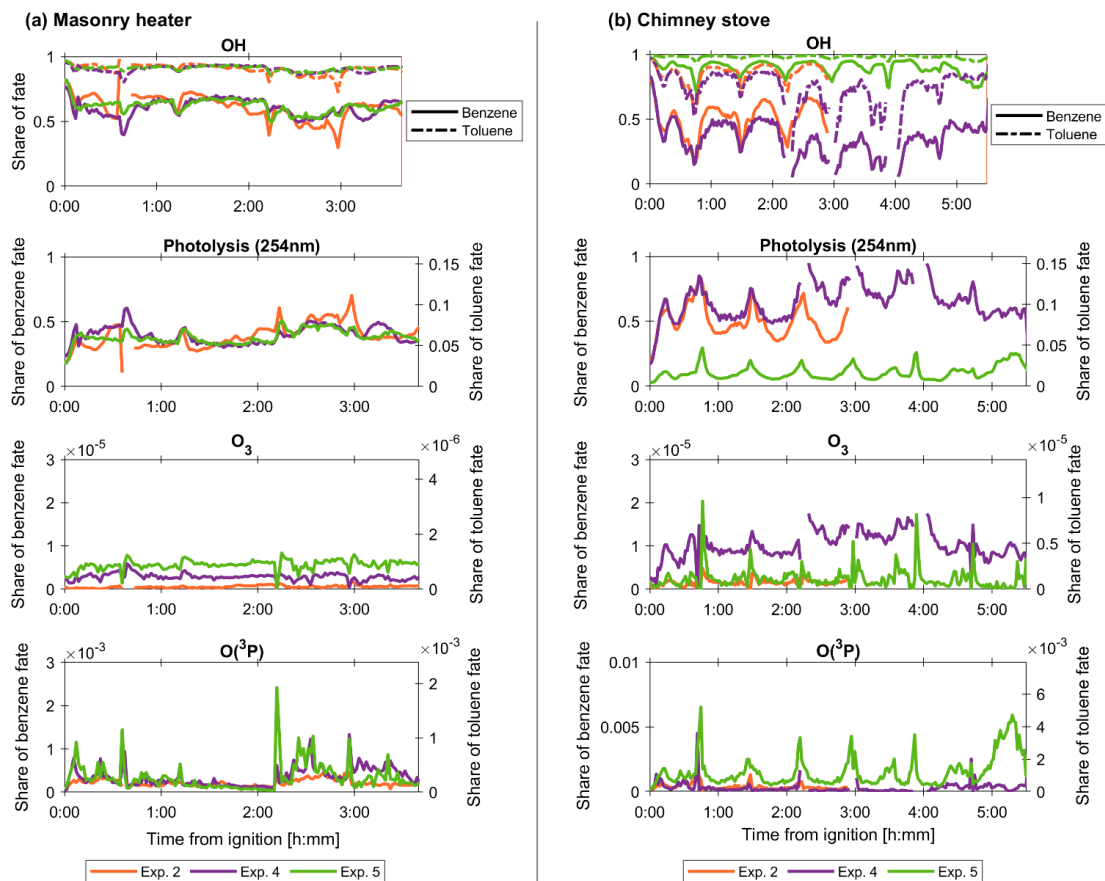

**Figure S10: Share of the considered pathways to the degradation of benzene and toluene in the PEAR OFR during the photochemical aging experiments.**

## S4.2 Fate of low-volatility organic compounds in the PEAR OFR

Estimations of the LVOC fates in the PEAR OFR were done based on Palm et al. (2016). Three possible pathways for LVOC depletion in the PEAR OFR were considered: condensation onto particles, reactions with OH, and condensation onto walls of the PEAR OFR. The rest exit the PEAR OFR in the gas-phase after which they are expected to condense on the walls of sampling lines.

The LVOC lifetime due to aerosol losses ( $\tau_{aer}$ ) was calculated using Eq. (S9):

$$\tau_{aer} = \frac{1}{CS} \quad (S9)$$

where condensation sink (CS,  $s^{-1}$ ; Fig. S3) was calculated according to Lehtinen et al. (2003), using an average of the particle size distributions before and after the PEAR OFR. The diffusion coefficient in use ( $D$ ;  $7 \times 10^{-6} \text{ m}^2 \text{ s}^{-1}$ ) was chosen as representative for oxidised,  $\sim 200 \text{ g mol}^{-1}$  molecules (Tang et al., 2015).

LVOC lifetime due to wall losses ( $\tau_{wall}$ ) was calculated with Eq. (S10):

$$\tau_{wall} = \left( \frac{A}{V} * \frac{2}{\pi} \sqrt{k_e D} \right)^{-1} \quad (S10)$$

$\tau_{wall}$  depends on the area-to-wall ratio ( $\frac{A}{V}$ ), which in the PEAR OFR is  $2.28 \text{ m}^2:0.139 \text{ m}^3 = 16.4 \text{ m}^{-1}$ . The applied eddy diffusion coefficient,  $k_e$ , was  $0.0036 \text{ s}^{-1}$ , similarly to Palm et al. (2016).  $\tau_{wall}$  was constant (603 s) for all of the PEAR OFR experiments.

Lifetime for LVOCs due to reactions with OH radicals was calculated with Eq. (S11):

$$\tau_{OH} = \frac{5}{k_{OH} * [OH]} \quad (S11)$$

based on the estimations that LVOCs as a total have an OH reaction rate ( $k_{OH}$ ) of  $1 \times 10^{-11} \text{ cm}^3 \text{ molec.}^{-1} \text{ s}^{-1}$  and that it takes five such reactions for LVOC fragmentation into higher-volatility compounds.

The resulting total lifetime was calculated with Eq. (S12):

$$\tau_{total} = \left( \frac{1}{\tau_{aer}} + \frac{1}{\tau_{wall}} + \frac{1}{\tau_{OH}} \right)^{-1} \quad (S12)$$

from which the fraction of each pathway ( $F_x$ , where footnote denotes the degradation pathway: aerosol, wall, or OH) to the total loss was derived with Eq. (S13).

$$F_x = (1 - F_{exit}) * \frac{\tau_x^{-1}}{\tau_{total}^{-1}} \quad (S13)$$

The fraction of LVOCs exiting the PEAR OFR in gas-phase ( $F_{exit}$ ) was by Eq. (S14):

$$F_{exit} = e^{-\frac{RT}{\tau_{total}^{-1}}} \quad (S14)$$

with the residence time (RT) being 139s for the 60lpm flow rate.

$F_{aer}$  was by far the most important fate of the LVOCs in the PEAR OFR throughout the experiments (Fig. S11). The amount of LVOCs estimated to exit the PEAR OFR as gas-phase LVOCs exceeded 0.1 % only during the middle burnout phase of the masonry heater combustion because of the low particle number concentrations during the char burning phase between the change from dry spruce to moist spruce combustion, which generated a low condensation sink into the PEAR OFR.

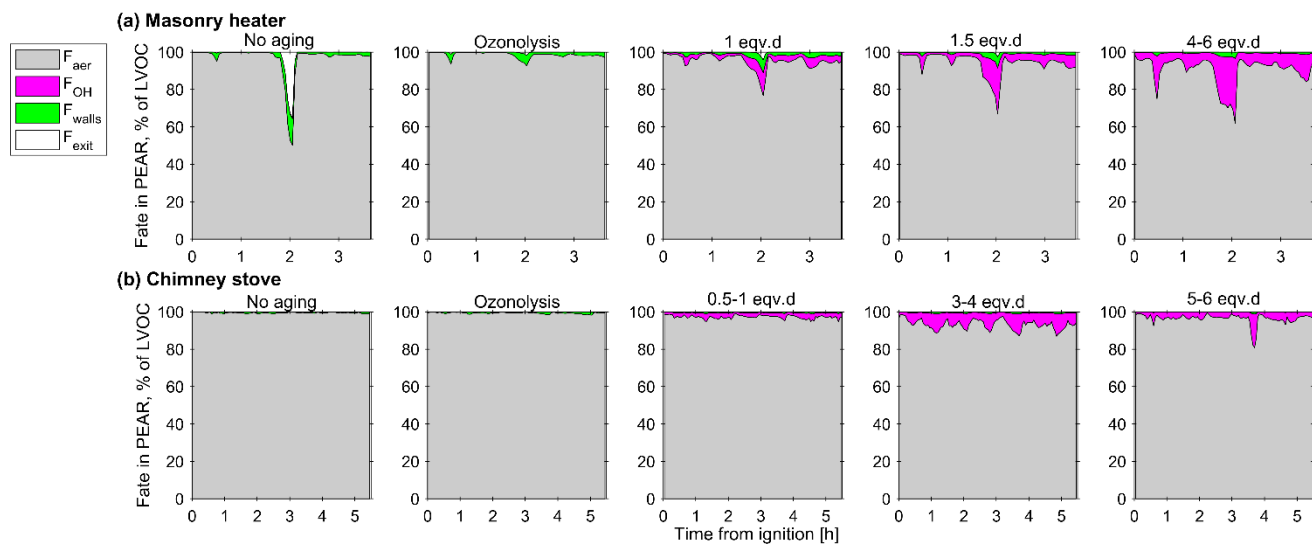

**Figure S11: Estimated fates of the low-volatility organic compounds in the PEAR OFR during the experiments with portions of the LVOCs condensing onto particles ( $F_{\text{aer}}$ ) and walls ( $F_{\text{walls}}$ ) and lost in reactions with OH ( $F_{\text{OH}}$ ). The remainder of the LVOCs ( $F_{\text{exit}}$ ) exit the PEAR OFR.**

## Section S5 – Transformation of the particulate phase

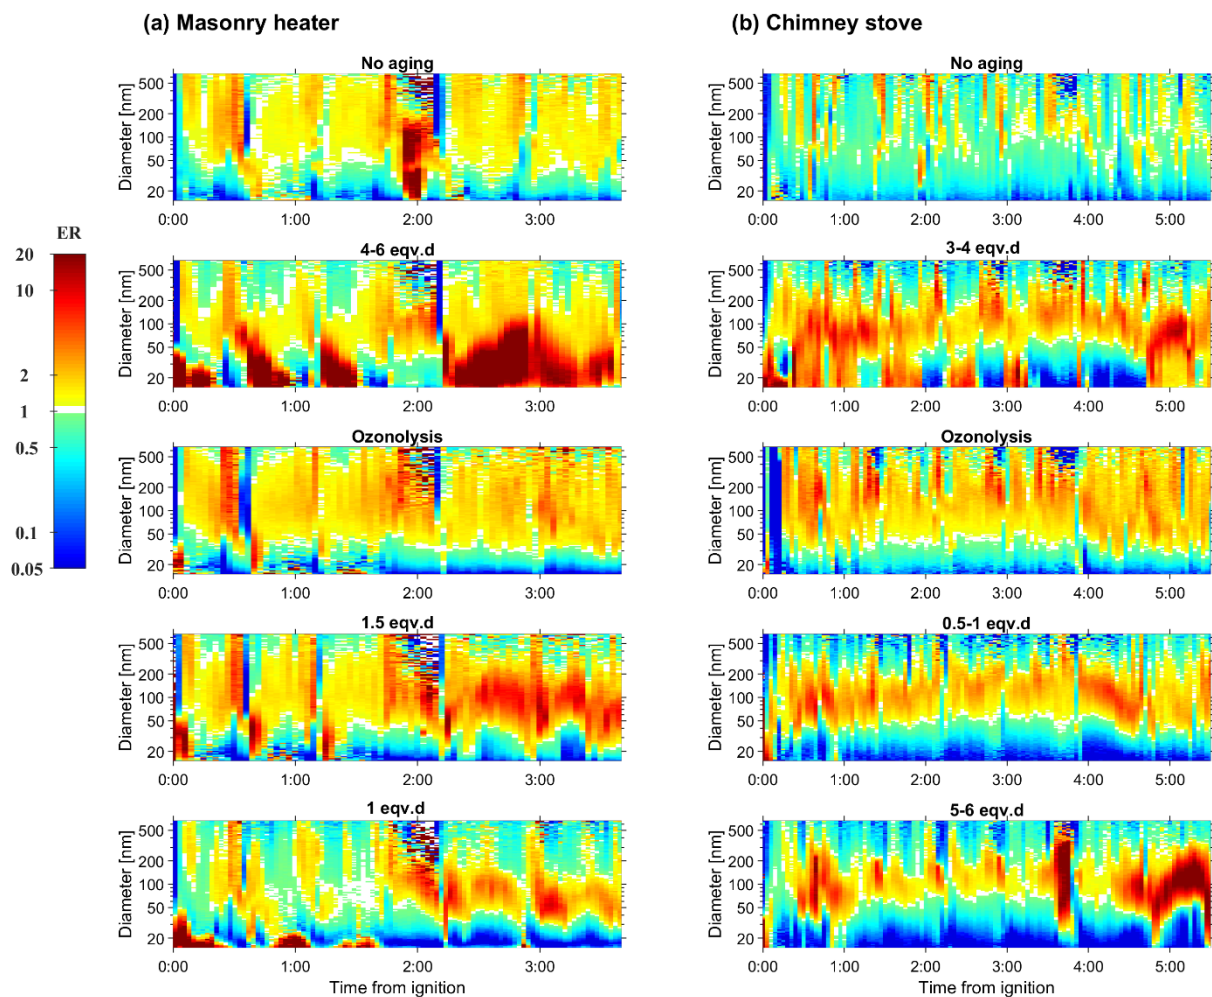

**Figure S12: Particle number enhancement ratios (ER; ratio of secondary to primary concentration) in each experiment, based on the SMPS measurements before and after the PEAR OFR.**

**Table S8: Average chemical composition of the particulate matter (normalised to dry, 13 % O<sub>2</sub> flue gas conditions) measured by SP-HR-ToF-AMS.**

|                | Exp. | Fuel  | Exposure<br>[eqv.d] | O:C  | H:C  | OS <sub>C</sub> | OM:OC | rBC<br>[mg m <sup>-3</sup> ] | OA<br>[mg m <sup>-3</sup> ] | PAH<br>[μg m <sup>-3</sup> ] | NO <sub>3</sub><br>[mg m <sup>-3</sup> ] | SO <sub>4</sub><br>[mg m <sup>-3</sup> ] | NH <sub>4</sub><br>[mg m <sup>-3</sup> ] | Chl<br>[mg m <sup>-3</sup> ] |
|----------------|------|-------|---------------------|------|------|-----------------|-------|------------------------------|-----------------------------|------------------------------|------------------------------------------|------------------------------------------|------------------------------------------|------------------------------|
| Masonry heater | 1    | S-5%  |                     | 0.55 | 1.51 | -0.18           | 1.86  | 28.89                        | 3.10                        | 98                           | 0.16                                     | 0.17                                     | 0.00                                     | 0.17                         |
|                |      | S-22% |                     | 0.82 | 1.33 | 0.15            | 2.20  | 21.77                        | 1.57                        | 27                           | 0.11                                     | 0.13                                     | 0.00                                     | 0.12                         |
|                | 2    | S-5%  | 6.72                | 1.45 | 1.06 | 0.92            | 3.02  | 42.83                        | 7.63                        | 16                           | 1.92                                     | 0.80                                     | 0.79                                     | 0.02                         |
|                |      | S-22% | 4.02                | 1.30 | 1.12 | 0.64            | 2.83  | 48.03                        | 24.98                       | 80                           | 1.50                                     | 1.08                                     | 0.96                                     | 0.03                         |
|                | 3    | S-5%  | O <sub>3</sub>      | 0.69 | 1.38 | 0.00            | 2.03  | 68.54                        | 9.64                        | 246                          | 1.42                                     | 0.21                                     | 0.03                                     | 0.13                         |
|                |      | S-22% | O <sub>3</sub>      | 0.81 | 1.28 | 0.15            | 2.19  | 12.15                        | 6.61                        | 180                          | 0.84                                     | 0.25                                     | 0.03                                     | 0.06                         |
|                | 4    | S-5%  | 0.94                | 0.90 | 1.31 | 0.22            | 2.31  | 59.40                        | 9.58                        | 105                          | 1.27                                     | 0.44                                     | 0.16                                     | 0.04                         |
|                |      | S-22% | 0.73                | 0.84 | 1.33 | 0.17            | 2.23  | 17.70                        | 44.11                       | 485                          | 1.00                                     | 0.38                                     | 0.49                                     | 0.04                         |
|                | 5    | S-5%  | 1.71                | 0.76 | 1.36 | 0.07            | 2.13  | 47.08                        | 13.69                       | 241                          | 1.36                                     | 0.27                                     | 0.16                                     | 0.05                         |
|                |      | S-22% | 1.46                | 0.78 | 1.34 | 0.11            | 2.16  | 24.47                        | 24.54                       | 455                          | 1.20                                     | 0.37                                     | 0.24                                     | 0.03                         |
| Chimney stove  | 1    | B-17% |                     | 0.86 | 1.25 | 0.22            | 2.26  | 23.03                        | 3.86                        | 65                           | 0.34                                     | 1.08                                     | 0.00                                     | 0.28                         |
|                |      | S-22% |                     | 1.47 | 0.91 | 0.41            | 2.32  | 27.97                        | 4.02                        | 80                           | 0.21                                     | 1.13                                     | 0.00                                     | 0.31                         |
|                | 2    | B-17% | 3.61                | 1.25 | 1.14 | 0.63            | 2.76  | 21.60                        | 8.78                        | 23                           | 5.07                                     | 1.66                                     | 1.38                                     | 0.02                         |
|                |      | S-22% | ~4                  | 1.47 | 1.19 | 0.90            | 2.80  | 19.70                        | 10.39                       | 26                           | 4.05                                     | 1.33                                     | 0.96                                     | 0.02                         |
|                | 3    | B-17% | O <sub>3</sub>      | 1.01 | 1.15 | 0.41            | 2.44  | 26.24                        | 8.33                        | 114                          | 3.32                                     | 1.82                                     | 0.22                                     | 0.12                         |
|                |      | S-22% | O <sub>3</sub>      | 0.82 | 1.30 | 0.16            | 2.20  | 24.89                        | 10.34                       | 271                          | 2.41                                     | 1.12                                     | 0.16                                     | 0.13                         |
|                | 4    | B-17% | 0.62                | 1.09 | 1.17 | 0.47            | 2.55  | 20.93                        | 9.95                        | 52                           | 10.90                                    | 2.93                                     | 1.88                                     | 0.08                         |
|                |      | S-22% | 0.70                | 1.04 | 1.23 | 0.05            | 2.37  | 27.91                        | 11.46                       | 215                          | 6.40                                     | 1.89                                     | 1.02                                     | 0.08                         |
|                | 5    | B-17% | 5.78                | 1.36 | 1.11 | 0.80            | 2.91  | 21.81                        | 9.45                        | 22                           | 7.34                                     | 2.68                                     | 1.66                                     | 0.02                         |
|                |      | S-22% | 5.83                | 0.87 | 1.32 | 0.10            | 2.74  | 19.63                        | 32.71                       | 158                          | 4.63                                     | 1.26                                     | 1.31                                     | 0.03                         |

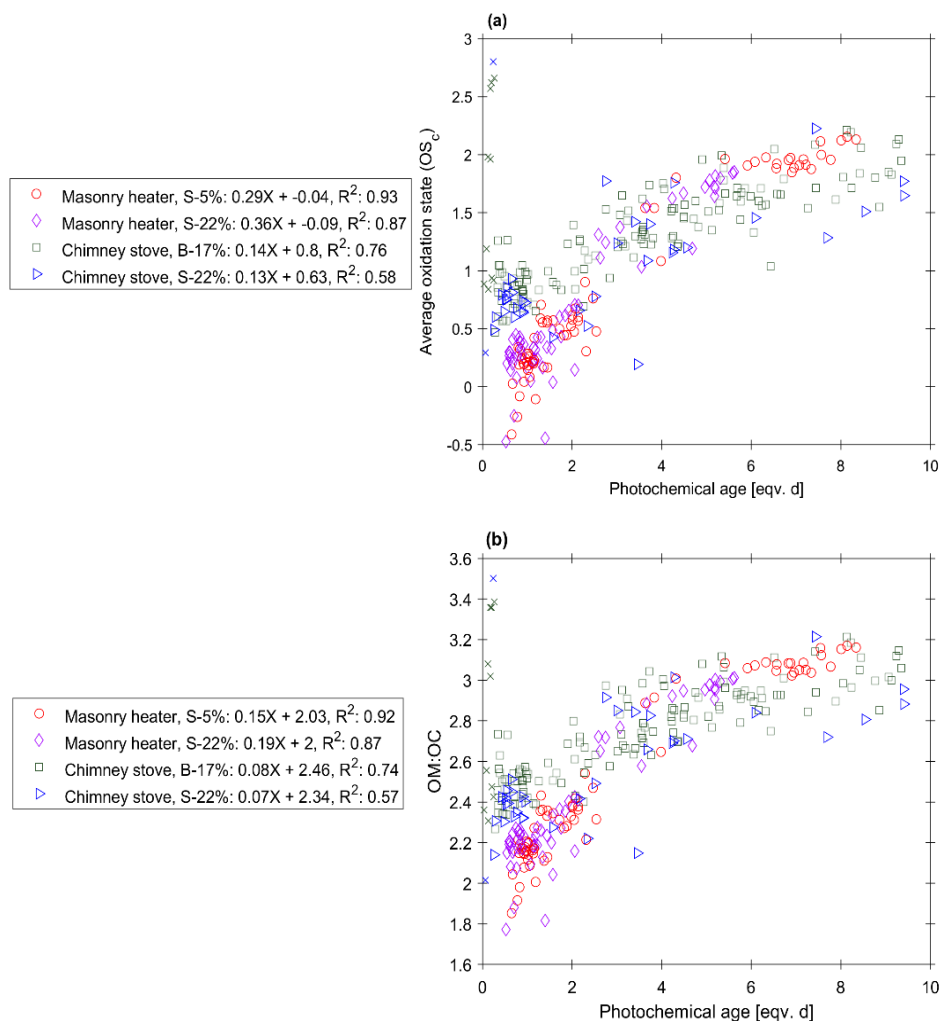

**Figure S13: Relationship between photochemical age and (a) oxidation state and (b) OM:OC ratio measured by SP-HR-ToF-AMS during the photochemical aging experiments. Coefficients of determination ( $R^2$ ) were calculated for the photochemical exposure range of 0.25-10 eqv.d. Values outside this age range (crossed over) were not considered.**

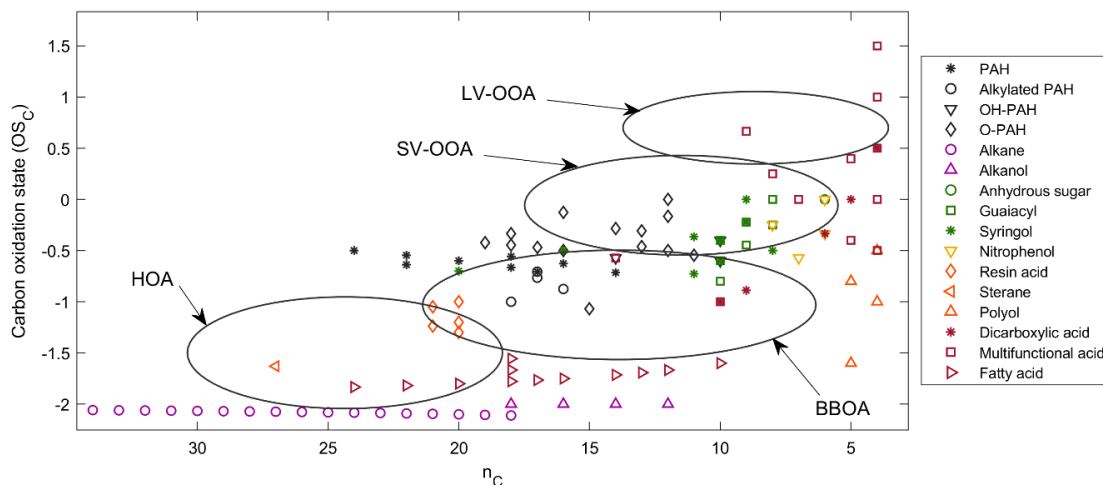

**Figure S14: Compounds analysed by IDTD-GC-ToFMS displayed in the  $OS_c$ - $n_c$  space. Approximate areas for ambient organic aerosol classes are presented to give approximate references for average ambient hydrocarbon-like OA (HOA), primary biomass burning OA (BBOA), semi-volatile oxidised OA (SV-OOA) and low-volatility oxidised OA (LV-OOA), as identified by Kroll et al. (2011)**

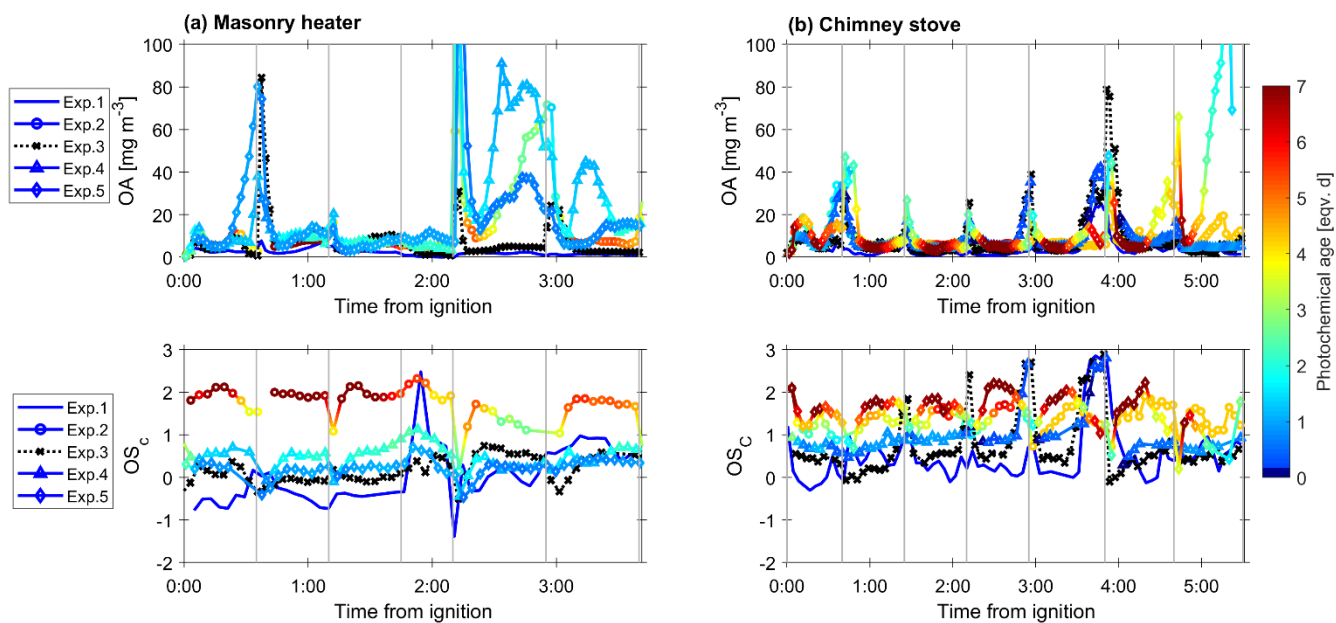

**Figure S15: Concentrations and average carbon oxidation states ( $OS_c$ ) of particulate OA from (a) masonry heater and (b) chimney stove measured by SP-HR-ToF-AMS downstream the PEAR OFR, normalised to dry, 13 %  $O_2$  flue gas conditions. Black dotted lines indicate ozonolysis experiments.**

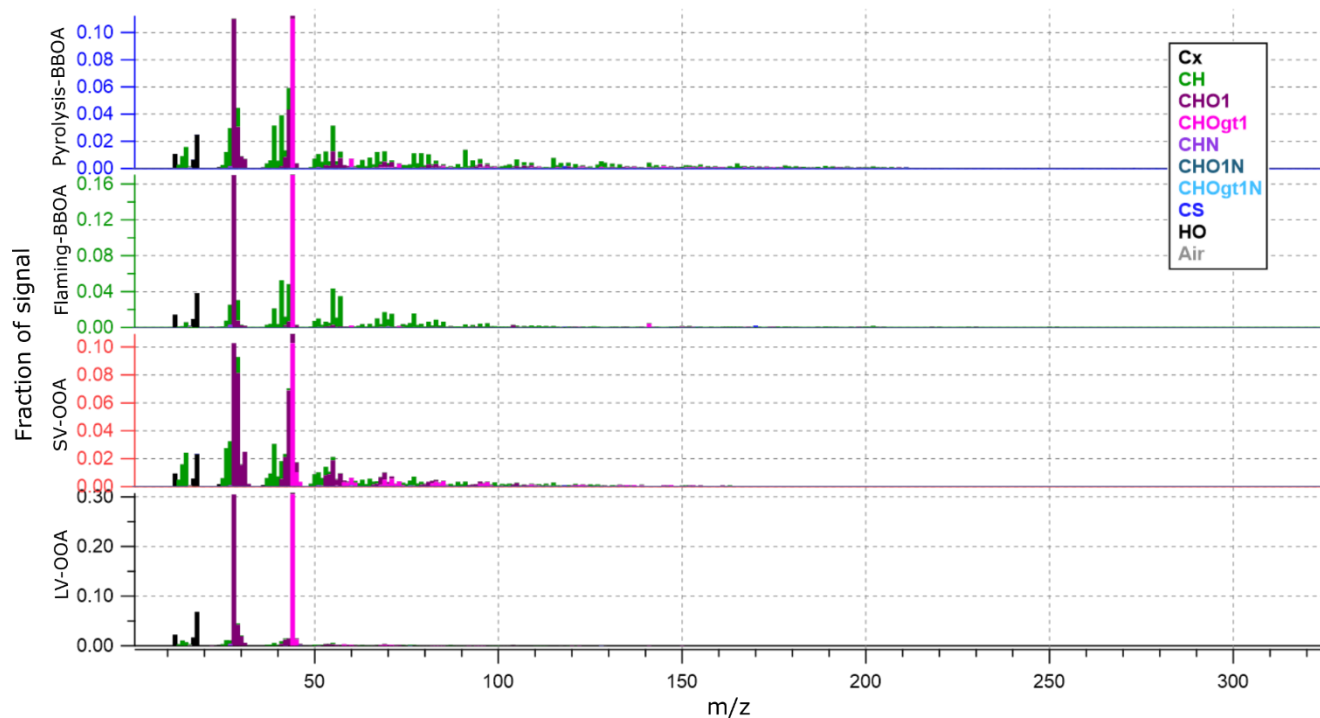

**Figure S16: Spectra of the four factors identified from the SP-HR-ToF-AMS OA spectra by positive matrix factorisation analysis.**

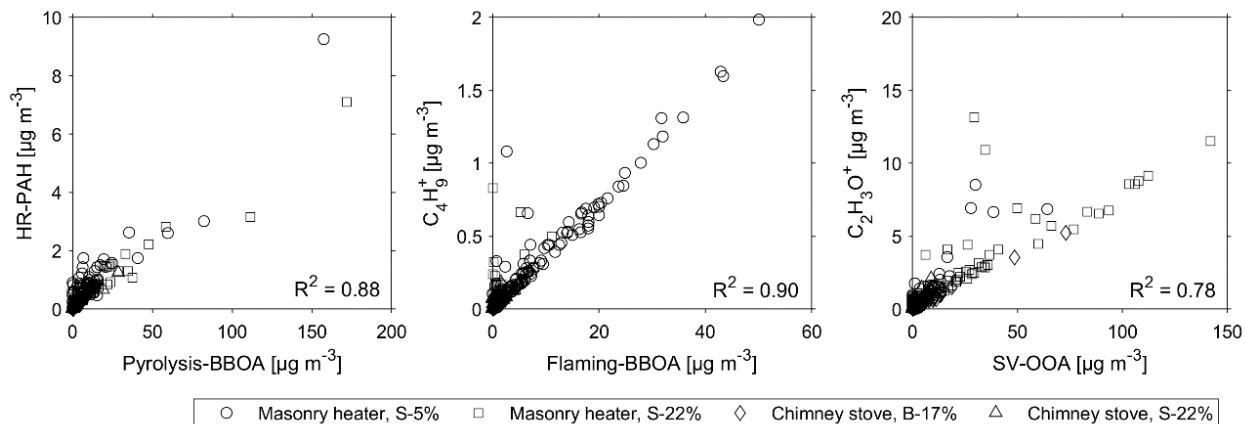

**Figure S17: Correlations between (a) pyrolysis-BBOA and HR-PAH, (b) flaming-BBOA and  $C_4H_9^+$ , and (c) SV-OOA to  $C_2H_3O^+$ , measured by SP-HR-ToF-AMS from the diluted exhaust downstream the PEAR OFR.**

## S5.1 In-situ derivatisation and thermal desorption - gas-chromatography - time-of-flight mass spectrometry

In-situ derivatisation and thermal desorption - gas-chromatography - time-of-flight mass spectrometry (IDTD-GC-ToFMS, (Orasche et al., 2011) was utilised in analysis of semi volatile organic target analytes in particulate phase. Subsamples were taken from the collected quartz fibre filters and prepared in GC-liners for the analyses. 10 µl Methyl-trimethylsilyl-trifluoroacetamid (MSTFA, Macherey-Nagel, Germany) was added automatically in each liner by the sampling robot (PAL Focus, Atas GL, Netherlands) before samples were placed into a direct thermal desorption unit (Linex and Optic 3, Atas GL, Netherlands). The samples were spiked with mixtures of isotope labelled internal standards and calibration standards for the purpose of calibration and quantification of the polar (Table S9) and non-polar (Table S10) compounds.

MSTFA was continuously added to the helium carrier gas on a 4 ml min<sup>-1</sup> stream, throughout the 16 minutes of thermal extraction at 300 °C. After the thermal extraction and derivatisation procedure, the pure helium flow was set back to 0.7 ml min<sup>-1</sup>, with a split flow of 50 ml min<sup>-1</sup>. IDTD was done at an isothermal GC temperature of 50° C in order to trap desorbed compounds at the front of the separation column before starting the GC-MS run. The column in use was an almost non-polar BPX5, 25 m, 0.22 mm ID, 0.25 µm film thicknesses (SGE, Australia), used in an Agilent 6890 gas chromatograph (Agilent, USA). Mass spectrometric detection in the range 35 to 500 m/z was carried out on a Pegasus III ToFMS (LECO, USA) using an acquisition frequency of 25 spectra per second. Evaluation of mass spectra was done with the ChromaTOF software package (LECO, USA).

**Table S9: Isotopically labelled internal standards used for polar compounds in the IDTD-GC-ToFMS analyses.**

| Isotopically labelled internal standard mixture | Calibration standard mixture |                  |
|-------------------------------------------------|------------------------------|------------------|
| 4-Nitrophenol d4                                | 1-Hydroxypyrene              | Glutaric acid    |
| Adipic acid d10                                 | 2-Hydroxy-1-naphthaldehyde   | Hexanedioic acid |
| Cholesterol d6                                  | 2-Ketoglutaric acid          | Hexanoic acid    |
| Dodecanol d25                                   | 2-Methyl-4-Nitrophenol       | Isopimaric acid  |
| Fumaric acid d2                                 | 2-Methylerythritol           | Levogluconan     |
| Glucose 13C6                                    | 2-Naphthanol                 | Linoleic acid    |
| Glycerol d8                                     | 3-Hydroglutaric acid         | Maleic acid      |
| Levogluconan 13C6                               | 3-Hydroxyphenanthrene        | Malic acid       |
| Palmitic acid d31                               | 4-Hydroxyphenanthrene        | Malonic acid     |
| Vanillin 13C6                                   | 4-Nitrocatechol              | Mannosan         |
|                                                 | 4-Nitrophenol                | Methyl vanillate |
|                                                 | 9-Hydroxyphenanthrene        | Oleic acid       |
|                                                 | Abietic acid                 | Palmitic acid    |
|                                                 | Acetosyringone               | Phthalic acid    |
|                                                 | Adipic Acid                  | Salicylic acid   |
|                                                 | Azelaic acid                 | Sorbit           |
|                                                 | Butanedioic acid             | Stearic acid     |
|                                                 | Cholesterol                  | Syringic Acid    |
|                                                 | Coniferaldehyde              | Tartaric acid    |
|                                                 | Ergosterol                   | Threitol         |
|                                                 | Erythritol                   | Trimellitic acid |
|                                                 | Fumaric acid                 | Vanillic acid    |
|                                                 | Galactosan                   | Vanillin         |

**Table S10: Isotopically labelled internal standards for nonpolar compounds used in the IDTD-GC-ToFMS analyses.**

| Isotopically labelled internal standard mixture | Calibration standard mixture    |                                 |
|-------------------------------------------------|---------------------------------|---------------------------------|
| 9,10-Anthracenedione 13C6                       | 1(2H)-Acenaphthylene            | Benz[a]pyrene                   |
| Acenaphthene d10                                | 1,2,4-Trimethylanthracene       | Benz[e]pyrene                   |
| Acenaphthylene d8                               | 1,2-Dimethylnaphthalene         | Benzo[a]anthracene-7,12-dione   |
| Anthracene d10                                  | 1,3,6,8-Tetramethylpyrene       | Benzo[b]fluoranthene            |
| Benz[a]anthracene d12                           | 1,3,7-Trimethylnaphthalene      | Benzo[b]naphtho[1,2-d]thiophene |
| Benz[a]pyrene d12                               | 1,4-Naphthoquinone              | Benzo[b]naphtho[2,1-d]furan     |
| Benz[e]pyrene d12                               | 1,8-Naphthalic anhydride        | Benzo[b]naphtho[2,1-d]thiophene |
| Benzo[a]anthracene-7,12-dione d10               | 11H-Benzo[a]fluoren-11-one      | Benzo[b]naphtho[2,3-d]furan     |
| Benzo[b]fluoranthene d12                        | 11H-Benzo[b]fluoren-11-one      | Benzo[c]phenanthrene            |
| Benzo[b]fluoranthene d12                        | 1-Ethylpyrene                   | Benzo[ghi]perylene              |
| Benzo[ghi]perylene d12                          | 1-Methyl-benz[a]anthracene      | Benzo[k]fluoranthene            |
| Benzo[k]fluoranthene d12                        | 1-Methylfluorene                | Benzo[k]fluoranthene            |
| Benzo[k]fluoranthene d12                        | 1-Methylpyrene                  | Biphenyl                        |
| Biphenyl d10                                    | 1-Naphthaldehyde                | Chrysene                        |
| Chrysene d12                                    | 2,2'-Binaphthalene              | Coronene                        |
| Coronene d12                                    | 2,3,6,7-Tetramethylanthracene   | Cyclopenta(def)phenanthrene     |
| Dibenz[ah]anthracene d14                        | 2,6-Dimethoxybenzoquinone       | Dibenz[ac]anthracene            |
| Dibenzothiophene d8                             | 2-Phenylnaphthalene             | Dibenz[ah]anthracene            |
| Docosane d46                                    | 3,6-Dimethylphenanthrene        | Dibenzothiophene                |
| Eicosane d42                                    | 3-Methylfluorene                | Fluoranthene                    |
| Fluoranthene d10                                | 4,5-Dimethylpyrene              | Fluorene                        |
| Fluorene d10                                    | 5,12-Naphthacenedione           | Indeno[1,2,3-cd]pyrene          |
| Hexadecane d34                                  | 6-Ethylchrysene                 | Methyleicosanoate               |
| Indeno[1,2,3-cd]pyrene d12                      | 7,12-Dimethyl-Benz[a]anthracene | n-Alkanes C12-C40               |
| Naphthalene d8                                  | 9,10-Anthracenedione            | Naphthalene                     |
| Octadecane d38                                  | 9,10-Dimethylphenanthrene       | Naphtho[2,1,8,7-klmn]xanthene   |
| Perylene d12                                    | 9H-Fluoren-9-one                | Perylene                        |
| Phenanthrene d10                                | 9-Methylphenanthrene            | Phenanthrene                    |
| Pyrene d10                                      | Acenaphthene                    | Picene                          |
| Tetracosane d50                                 | Acenaphthonquinone              | Pyrene                          |
| Triacontane d62                                 | Acenaphthylene                  | Retene                          |
|                                                 | Anthracene                      | Xanthone                        |
|                                                 | Benz[a]anthracene               |                                 |

**Table S11: Secondary concentrations (ng m<sup>-3</sup>) of compounds measured by IDTD-GC-ToFMS. Normalised to dry, 13 % O<sub>2</sub> flue gas conditions. Attached as a .xlsx file**

**Table S12: Pearson correlation coefficients between the particulate organic aerosol constituents measured by SP-HR-ToF-AMS (PMF and HR-PAH) and IDTD-GC-TOF-MS.**

|                |                                 | PMF factors    |              |             |             | HR-PAH      |             |             |             |             |             |
|----------------|---------------------------------|----------------|--------------|-------------|-------------|-------------|-------------|-------------|-------------|-------------|-------------|
|                |                                 | Pyrolysis-BBOA | Flaming-BBOA | SV-OOA      | LV-OOA      | Total       | Unsub-PAH   | OPAH        | MPAH        | NPAH        | APAH        |
| PMF factors    | Pyrolysis-BBOA                  | 1.00           | 0.17         | 0.40        | -0.02       | <b>0.96</b> | <b>0.96</b> | <b>0.87</b> | <b>0.97</b> | <b>0.86</b> | <b>0.89</b> |
|                | Flaming-BBOA                    | 0.17           | 1.00         | -0.07       | -0.21       | 0.19        | 0.21        | 0.17        | 0.14        | 0.17        | 0.21        |
|                | SV-OOA                          | 0.40           | -0.07        | 1.00        | 0.35        | 0.48        | 0.44        | <b>0.70</b> | 0.38        | <b>0.68</b> | 0.57        |
|                | LV-OOA                          | -0.02          | -0.21        | 0.35        | 1.00        | -0.02       | -0.04       | 0.09        | -0.04       | 0.06        | 0.03        |
| HR-PAH         | Total                           | <b>0.96</b>    | 0.19         | 0.48        | -0.02       | 1.00        | <b>1.00</b> | <b>0.94</b> | <b>0.99</b> | <b>0.94</b> | <b>0.96</b> |
|                | UnsubPAH                        | <b>0.96</b>    | 0.21         | 0.44        | -0.04       | <b>1.00</b> | 1.00        | <b>0.93</b> | <b>0.99</b> | <b>0.93</b> | <b>0.95</b> |
|                | OPAH                            | <b>0.87</b>    | 0.17         | <b>0.70</b> | 0.09        | <b>0.94</b> | <b>0.93</b> | 1.00        | <b>0.88</b> | <b>0.98</b> | <b>0.94</b> |
|                | MPAH                            | <b>0.97</b>    | 0.14         | 0.38        | -0.04       | <b>0.99</b> | <b>0.99</b> | <b>0.88</b> | 1.00        | <b>0.88</b> | <b>0.92</b> |
|                | NPAH                            | <b>0.86</b>    | 0.17         | <b>0.68</b> | 0.06        | <b>0.94</b> | <b>0.93</b> | <b>0.98</b> | <b>0.88</b> | 1.00        | <b>0.97</b> |
|                | APAH                            | <b>0.89</b>    | 0.21         | 0.57        | 0.03        | <b>0.96</b> | <b>0.95</b> | <b>0.94</b> | <b>0.92</b> | <b>0.97</b> | 1.00        |
| IDTD-GC-ToF-MS | PAH                             | 0.01           | <b>0.64</b>  | -0.22       | -0.17       | 0.19        | 0.27        | 0.04        | 0.15        | 0.09        | 0.09        |
|                | OH-PAHs                         | 0.31           | -0.05        | <b>0.88</b> | <b>0.65</b> | <b>0.75</b> | <b>0.65</b> | <b>0.92</b> | 0.54        | <b>0.88</b> | <b>0.87</b> |
|                | Carbonyl-PAHs                   | 0.50           | -0.12        | 0.49        | 0.35        | <b>0.69</b> | <b>0.67</b> | <b>0.74</b> | 0.52        | <b>0.65</b> | <b>0.58</b> |
|                | alkylated PAHs                  | 0.01           | <b>0.75</b>  | -0.16       | -0.26       | 0.21        | 0.29        | 0.01        | 0.24        | 0.09        | 0.14        |
|                | alkanes                         | -0.10          | 0.31         | -0.19       | -0.38       | -0.17       | -0.12       | -0.25       | -0.10       | -0.22       | -0.17       |
|                | alkanols                        | -0.11          | 0.26         | 0.43        | <b>0.70</b> | 0.22        | 0.17        | 0.36        | 0.06        | 0.35        | 0.38        |
|                | anhydrous sugars                | 0.53           | -0.24        | <b>0.70</b> | 0.35        | <b>0.68</b> | <b>0.61</b> | <b>0.71</b> | <b>0.65</b> | <b>0.78</b> | <b>0.76</b> |
|                | guaiacyls                       | 0.10           | 0.26         | 0.10        | -0.09       | 0.29        | 0.30        | 0.21        | 0.26        | 0.28        | 0.28        |
|                | nitrophenols                    | -0.17          | -0.14        | <b>0.60</b> | <b>0.76</b> | 0.09        | -0.03       | 0.37        | -0.08       | 0.32        | 0.31        |
|                | resin acids                     | <b>0.63</b>    | 0.23         | -0.24       | -0.42       | 0.45        | 0.54        | 0.09        | <b>0.66</b> | 0.25        | 0.24        |
|                | polyols                         | 0.27           | -0.09        | <b>0.93</b> | <b>0.63</b> | <b>0.71</b> | <b>0.61</b> | <b>0.89</b> | 0.51        | <b>0.87</b> | <b>0.87</b> |
|                | dicarboxylic acids              | 0.12           | -0.01        | <b>0.87</b> | <b>0.74</b> | <b>0.63</b> | 0.53        | <b>0.83</b> | 0.40        | <b>0.80</b> | <b>0.81</b> |
|                | multifunctional acids/anhydrids | -0.10          | -0.16        | <b>0.93</b> | <b>0.89</b> | 0.40        | 0.26        | <b>0.71</b> | 0.15        | <b>0.66</b> | <b>0.67</b> |
|                | fatty acids                     | -0.05          | 0.50         | -0.40       | -0.34       | -0.08       | 0.01        | -0.26       | -0.01       | -0.21       | -0.15       |

## References

- Atkinson, R., Baulch, D. L., Cox, R. A., Crowley, J. N., Hampson Jr, R. F., Kerr, J. A., Rossi, M. J. and Troe, J.: Summary of evaluated kinetic and photochemical data for atmospheric chemistry, IUPAC Subcommittee on gas kinetic data evaluation for atmospheric chemistry, 20, 2001.
- 5 Atkinson, R.: Kinetics and mechanisms of the gas-phase reactions of the hydroxyl radical with organic compounds under atmospheric conditions, *Chem. Rev.*, 86, 69-201, 1986.
- Atkinson, R., Aschmann, S. M. and Carter, W. P.: Kinetics of the reactions of O<sub>3</sub> and OH radicals with furan and thiophene at 298±2 K, *Int J Chem Kinet*, 15, 51-61, 1983.
- Avagyan, R., Nyström, R., Lindgren, R., Boman, C. and Westerholm, R.: Particulate hydroxy-PAH emissions from a  
10 residential wood log stove using different fuels and burning conditions, *Atmos. Environ.*, 140, 1-9, 2016.
- Barnet, P., Dommen, J., DeCarlo, P. F., Tritscher, T., Praplan, A. P., Platt, S. M., Prévôt, A. S. H., Donahue, N. M. and Baltensperger, U.: OH clock determination by proton transfer reaction mass spectrometry at an environmental chamber, *Atmos. Meas. Tech.*, 5, 647, 2012.
- Baulch, D. L., Cobos, C. J., Cox, R. A., Frank, P., Hayman, G., Just, T., Kerr, J. A., Murrells, T., Pilling, M. J., Troe, J.,  
15 Walker, W. and Warnatz, J.: Evaluated kinetic data for combustion modeling. Supplement I, *J. Phys. Chem. Ref. Data*, 23, 847-848, 1994.
- Baulch, D. L., Cobos, C., Cox, R. A., Esser, C., Frank, P., Just, T., Kerr, J. A., Pilling, M. J., Troe, J. and Walker, R. W., and Warnatz, J.: Evaluated kinetic data for combustion modelling, *J. Phys. Chem. Ref. Data*, 21, 411-734, 1992.
- Bertrand, A., Stefanelli, G., Jen, C. N., Pieber, S. M., Bruns, E. A., Ni, H., Temime-Roussel, B., Slowik, J. G., Goldstein, A.  
20 H., El Haddad, I., Baltensperger, U., Prévôt, A. S. H., Wortham, H. and Marchand, N.: Evolution of the chemical fingerprint of biomass burning organic aerosol during aging, *Atmos. Chem. Phys.*, 18, 7607-7624, 2018.
- Bruns, E. A., Krapf, M., Orasche, J., Huang, Y., Zimmermann, R., Drinovec, L., Močnik, G., El-Haddad, I., Slowik, J. G., Dommen, J., Baltensperger, U. and Prévôt, A S H: Characterization of primary and secondary wood combustion products generated under different burner loads, *Atmos. Chem. Phys.*, 15, 2825-2841, 2015.
- 25 Cappellin, L., Karl, T., Probst, M., Ismailova, O., Winkler, P. M., Soukoulis, C., Aprea, E., Märk, T. D., Gasperi, F. and Biasioli, F.: On quantitative determination of volatile organic compound concentrations using proton transfer reaction time-of-flight mass spectrometry, *Environ. Sci. Technol.*, 46, 2283-2290, 2012.
- Cvetanović, R. J.: Evaluated chemical kinetic data for the reactions of atomic oxygen O (3P) with unsaturated hydrocarbons, *J. Phys. Chem. Ref. Data*, 16, 261-326, 1987.

- 30 Czech, H., Miersch, T., Orasche, J., Abbaszade, G., Sippula, O., Tissari, J., Michalke, B., Schnelle-Kreis, J., Streibel, T., Jokiniemi, J. and Zimmermann, R.: Chemical composition and speciation of particulate organic matter from modern residential small-scale wood combustion appliances, *Sci. Total Environ.*, 612, 636-648, 2018.
- Grosjean, E. and Grosjean, D.: Rate constants for the gas-phase reaction of ozone with 1, 1-disubstituted alkenes, *Int J Chem Kinet*, 28, 911-918, 1996.
- 35 Hartikainen, A., Yli-Pirilä, P., Tiitta, P., Leskinen, A., Kortelainen, M., Orasche, J., Schnelle-Kreis, J., Lehtinen, K. E., Zimmermann, R., Jokiniemi, J. and Sippula O.: Volatile organic compounds from logwood combustion: emissions and transformation under dark and photochemical aging conditions in a smog chamber, *Environ. Sci. Technol.*, 52, 4979-4988, 2018.
- Herron, J. T.: Evaluated chemical kinetic data for the reactions of atomic oxygen O(3P) with saturated organic compounds in the gas phase, *J. Phys. Chem. Ref. Data*, 17, 967-1026, 1988.
- 40 Herring, C. L., Faiola, C. L., Massoli, P., Sueper, D., Erickson, M. H., McDonald, J. D., Simpson, C. D., Yost, M. G., Jobson, B. T. and VanReken, T. M.: New methodology for quantifying polycyclic aromatic hydrocarbons (PAHs) using high-resolution aerosol mass spectrometry, *Aerosol Sci. Tech.*, 49, 1131-1148, 2015.
- Keller-Rudek, H., Moortgat, G. K., Sander, R. and Sörensen, R.: The MPI-Mainz UV/VIS Spectral Atlas of Gaseous Molecules of Atmospheric Interest, [online] Available from: [www.uv-vis-spectral-atlas-mainz.org](http://www.uv-vis-spectral-atlas-mainz.org), 2015.
- 45 Kroll, J. H., Donahue, N. M., Jimenez, J. L., Kessler, S. H., Canagaratna, M. R., Wilson, K. R., Altieri, K. E., Mazzoleni, L. R., Wozniak, A. S., Bluhm, H., Mysak, E. R., Smith, J. D., Kolb, C. E. and Worsnop, D. R.: Carbon oxidation state as a metric for describing the chemistry of atmospheric organic aerosol, *Nat. Chem.*, 3, 133, 2011.
- Lehtinen, K. E., Korhonen, H., Maso, M. D. and Kulmala, M.: On the concept of condensation sink diameter, *Boreal Environ. Res.*, 8, 405-412, 2003.
- 50 Li, R., Palm, B. B., Ortega, A. M., Hlywiak, J., Hu, W., Peng, Z., Day, D. A., Knote, C., Brune, W. H., De Gouw, J. A. and Jimenez, J. L.: Modeling the radical chemistry in an oxidation flow reactor: radical formation and recycling, sensitivities, and the OH exposure estimation equation, *The Journal of Physical Chemistry A*, 119, 4418-4432, 2015.
- Manion, J.A., Huie, R. E., Levin, R. D., Burgess Jr., D. R., Orkin, V. L., Tsang, W., McGivern, W. S., Hudgens, J. W., Knyazev, V. D., Atkinson, D. B., Chai, E., Tereza, A. M., Lin, C.-Y., Allison, T. C., Mallard, W. G., Westley, F., Herron, J. T., Hampson, R. F., and Frizzell, D. H., NIST Chemical Kinetics Database, NIST Standard Reference Database 17, Version 7.0 (Web Version), Release 1.6.8, Data version 2015.09, National Institute of Standards and Technology, Gaithersburg, Maryland, 20899-8320. Web address: <http://kinetics.nist.gov/>

- Miersch, T., Czech, H., Hartikainen, A., Ihalainen, M., Orasche, J., Abbaszade, G., Tissari, J., Streibel, T., Jokiniemi, J.,  
60 Sippula, O. and Zimmermann, R.: Impact of photochemical ageing on Polycyclic Aromatic Hydrocarbons (PAH) and  
oxygenated PAH (Oxy-PAH/OH-PAH) in logwood stove emissions, *Sci. Total Environ.*, 686, 382-392, 2019.
- Orasche, J., Schnelle-Kreis, J., Abbaszade, G. and Zimmermann, R.: In-situ derivatization thermal desorption GC-TOFMS for  
direct analysis of particle-bound non-polar and polar organic species, *Atmos. Chem. Phys.*, 11, 8977-8993, 2011.
- Palm, B. B., Campuzano-Jost, P., Ortega, A. M., Day, D. A., Kaser, L., Jud, W., Karl, T., Hansel, A., Hunter, J. F., Cross, E.  
65 S., Kroll, J. H., Peng, Z., Brune, W. H. and Jimenez, J. L.: In situ secondary organic aerosol formation from ambient pine  
forest air using an oxidation flow reactor, *Atmos. Chem. Phys.*, 16, 2943-2970, 2016.
- Paulson, S. E., Orlando, J. J., Tyndall, G. S. and Calvert, J. G.: Rate coefficients for the reactions of O (3P) with selected  
biogenic Hydrocarbons, *Int J Chem Kinet*, 27, 997-1008, 1995.
- Peng, Z., Day, D. A., Ortega, A. M., Palm, B. B., Hu, W., Stark, H., Li, R., Tsigaridis, K., Brune, W. H. and Jimenez, J. L.:  
70 Non-OH chemistry in oxidation flow reactors for the study of atmospheric chemistry systematically examined by modeling,  
*Atmos. Chem. Phys.*, 16, 4283-4305, 2016.
- Peng, Z. and Jimenez, J. L.: Modeling of the chemistry in oxidation flow reactors with high initial NO, *Atmos. Chem. Phys.*,  
17, 11991-12010, 2017.
- Peng, Z., Lee-Taylor, J., Orlando, J. J., Tyndall, G. S. and Jimenez, J. L.: Organic peroxy radical chemistry in oxidation flow  
75 reactors and environmental chambers and their atmospheric relevance, *Atmospheric Chem. Phys.*, 19(2), 813–834,  
doi:10.5194/acp-19-813-2019, 2019.
- Stedman, D. H. and Niki, H.: Ozonolysis rates of some atmospheric gases, *Environ. Lett.*, 4, 303-310, 1973.
- Tang, M. J., Shiraiwa, M., Pöschl, U., Cox, R. A. and Kalberer, M.: Compilation and evaluation of gas phase diffusion  
coefficients of reactive trace gases in the atmosphere: Volume 2. Diffusivities of organic compounds, pressure-normalised  
80 mean free paths, and average Knudsen numbers for gas uptake calculations, *Atmos. Chem. Phys.*, 15, 5585-5598, 2015.
- Toby, S., Van de Burgt, L J and Toby, F. S.: Kinetics and chemiluminescence of ozone-aromatic reactions in the gas phase, *J.*  
*Phys. Chem.*, 89, 1982-1986, 1985.
